# Supplementary material for: Mindfulness for the Mental Health and Well-Being of Post-Secondary Students: A Systematic Review and Meta-Analysis
Source: Springer Nature journal article supplement (doi:10.1007/s12671-018-0979-z), 2018-06-28
Supplement: MOESM1 [file 15893834]

Mindfulness Based Interventions for the Mental Health of Post-Secondary Students:

A Meta-Analysis

# Supplementary Material

Contents:

Section 1: Changes from the Protocol for this Review.……………………………………………….page 2

Section 2: Outcome Ratings…………………………………………………….……….…………….page 2

Section 3: Search Terms Across Databases…………………………………………….………….….page 3

Section 4: Full Text Screening Form………………………………………………….…...………….page 5

Section 5: Data Extraction Content………………………………………………….….………….….page 6

Section 6: Effective Sample Size Calculations…………………………………………….………….page 6

Section 7: Back-Transformations (Scales).………………………………………..……….………….page 7

Section 8: Optimal Information Size………………………………………………………….……….page 8

Section 9: References of Key Excluded and Ongoing studies…………………..…………………….page 9

Section 10: Characteristics of Include Studies Table……………………………………..………..….page 11

Section 11: Summary of Findings GRADE Table…………………………………………………….page 74

## Section 1: Changes from the Protocol for this Review

The scope of the review was modified from the initial protocol. The following is a presentation of the modifications:

- **Study Design**: no changes.
- **Population:** no changes.
- **Intervention:** no changes.
- **Comparator:** no changes.
- **Outcomes:** The protocol stated we would look at post-intervention and 1-month follow-up. We extracted and presented all follow-ups available. The protocol also stated we would look at emotion regulation. As only two studies were found on emotion regulation, the results were excluded from the manuscript but included in the supplementary documentation.
- **Subgroup analyses:** no changes although we did add a *post-hoc* subgroup analyses exploring differences between MBSR, MBCT and Other MBIs. This was identified as being *post hoc*  in the review.

## Section 2: Outcome Ratings

**Will provide names and university after blinded manuscript review.*

| Outcome | (Primary Author) | (MSW with mindfulness experience) | (Lead psychiatrist with mindfulness experience) | (Medical Director) | (Family physician with mindfulness experience) | Mean | Included? |
| --- | --- | --- | --- | --- | --- | --- | --- |
| Stress | 8 | 6 | 8 | 4 | 8 | 6.8 | Secondary |
| Anxiety | 8 | 9 | 6 | 7 | 8 | 7.6 | Primary |
| Depression/mood | 8 | 9 | 5 | 7 | 6 | 7 | Primary |
| Sleep | 6 | 6 | 7 | 7 | 7 | 6.6 | Secondary |
| Substance use | 8 | 4 | 7 | 8 | 6 | 6.6 | Secondary |
| Mindfulness | 3 | 3 | 7 | 2 | 5 | 4 | Not included |
| Emotion Regulation | 5 | 3 | 6 | 9 | 5 | 5.6 | Secondary |
| Eating Disorders | - | - | - | 9 | - | - | Not included* |
| Pain | - | - | 8 | - | - | - | Not included** |

*For a recent systematic review on mindfulness for binge eating disorder see:Godfrey KM, Gallo LC, Afari N. Mindfulness-based interventions for binge eating: a systematic review and meta-analysis. Journal of behavioral medicine. 2015 Apr 1;38(2):348-62.

**For a recent systematic review on mindfulness for chronic pain see:Hilton L, Hempel S, Ewing BA, Apaydin E, Xenakis L, Newberry S, Colaiaco B, Maher AR, Shanman RM, Sorbero ME, Maglione MA. Mindfulness Meditation for Chronic Pain: Systematic Review and Meta-analysis. Annals of Behavioral Medicine. 2016:1-5.

## Section 3: Search Terms Across Databases

| **Database** | **Population**: post-secondary students | **Intervention** – Mindfulness Based Intervention | **Randomized Controlled Trials** (sensitive) | **Hits** |
| --- | --- | --- | --- | --- |
| OVID MEDLINE | exp Students/px [Psychology]  OR schools, health occupations/ or universities/  OR Young Adult/ or Student Health Services/  OR Education, Medical/ or Education, Public Health Professional/ or Education, Nursing, Graduate/ or Education, Dental, Graduate/ or Education, Nursing, Baccalaureate/ or Education, Professional/ or Education, Medical, Graduate/ or Education, Nursing/ or Education, Premedical/ or Education, Pharmacy/ or Education, Pharmacy, Graduate/ or Education, Predental/ or Education, Medical, Undergraduate/ or Education, Nonprofessional/ or Education, Nursing, Diploma Programs/ or Education, Veterinary/ or Education, Graduate/ or Education, Dental/  OR university*.mp.  OR student*.mp.  OR college*.mp.  OR undergrad*.mp.  OR graduate.mp.  OR young adult*.mp.  OR emerging adult*.mp. | Mindfulness/ OR MBSR.mp. OR MBCT.mp.  OR Stress, Psychological/th [Therapy]  OR mindful*.mp.  OR Meditation/mt [Methods]  OR meditation.mp. or Meditation/ | Randomized clinical trial.pt.  OR controlled clinical tial.pt.  OR Randomized.ab.  OR Randomly.ab.  OR Trial.ab.  OR Groups.ab. | 859 |
| EMBASE | exp college student/  OR exp graduate student/  OR allied health student/ or physical therapy student/ or physician assistant student/ or student/ or dental student/ or dietetics student/ or paramedical student/ or audiology student/ or graduate nursing student/ or dental hygiene student/ or occupational therapy student/ or male nursing student/ or non-medical student/ or nursing student/ or public health student/ or medical student/ or athletic training student/ or chiropractic student/ or baccalaureate nursing student/ or social work student/ or midwifery student/ or premedical student/ or health student/ or research student/ or university student/ or undergraduate student/ or pharmacy student/ or PhD student/  OR young adult/  OR young adult*.mp.  OR emerging adult*.mp.  OR university.mp.  OR exp university/  OR college*.mp.  OR college/ | mindfulness/  OR mindful*.mp.  OR meditation.mp.  OR MBCT.mp.  OR MBSR.mp.  OR MBI.mp.  OR exp mental stress/th [Therapy] | Random*:.tw.  OR clinical trial:.mp.  OR exp health care quality | 830 |
| PsychInfo | students/  OR exp college students/  OR college*.mp.  OR student*.mp.  OR exp graduate students/  OR exp graduate education/  OR university.mp.  OR young adult*.mp.  OR emerging adult*.mp. | mindfulness/  OR mindfulness.mp.  OR exp psychological stress/  OR mindful*.mp.  OR MBCT.mp.  OR MBSR.mp.  OR MBI.mp. | control:.tw.  OR random:.tw.  OR exp treatment/ | 1096 |
| CINAHL | (MH "Students+")  OR (MH "Students, College")  OR (MH "Students, Midwifery")  OR (MH "Students, Nursing, Doctoral")  OR (MH "Students, Nursing, Associate")  OR (MH "Students, Nurse Midwifery")  OR (MH "Students, Physical Therapy")  OR (MH "Students, Physician Assistant") OR (MH "Students, Medical Technology")  OR "student*"  OR (MH "Young Adult") OR "young adult*"  OR "emerging adult*" | (MH "Mindfulness")  OR "mindful*"  OR (MH "Meditation")  OR "meditation"  OR "MBSR"  OR "MBCT" | Exp prognosis  Exp study design  Random* | 239 |
| Cochrane Clinical Trials (CENTRAL) | young adult*  OR emerging adult*  OR student*  OR college  OR university | mindful*  OR meditation  OR MBSR  OR MBCT | none | 1068 |
| Clinical Trials.gov | Young adult  OR emerging adult  OR student  OR college  OR university | Mindfulness  OR Mindful  OR meditation  OR MBSR  OR MBCT |  | 787 |
| Proquest dissertations | all(student* OR college OR university OR young adult* OR emerging adult*) | AND all((mindful* OR meditation OR MBSR OR MBCT) | AND all(random* OR RCT OR clinical trial)) | 480 |
| WHO portal | Student* | mindfulness  OR meditation  OR MBSR  OR MBCT | - | 1045 |
| Google Scholar | mindfulness | student | random | First 100 hits |
| OpenGrey | student*  OR university  OR college  OR young adult*  OR emerging adult* | mindful*  OR meditation  OR MBCT  OR MBSR | AND (random*) | 3 |

## Section 4: Full Text Screening Form

| **1. POPULATION**  **Is the population of interest was students** (undergraduate, graduate, health professional)**?**   - If yes, go to design. - If no, exclude.   *Exclude if population has:*   - Psychosis - ADHD - Physical neurological disorder - Other intellectual or developmental disabilities |  |
| --- | --- |
| **2. DESIGN**  **Is the study design a randomized controlled trial, including parallel-group, cluster-randomized and factorial design trials?**   - If yes, go to next question. - If no and indicates another study design, exclude. |  |
| **3. INTERVENTION**  **i) Is the intervention of interest ‘mindfulness based intervention’ MBSR or MBCT?**   - If yes or an intervention based on MBSR or MBCT, go to 5. - If no or unsure, continue intervention assessment.   **ii) Is the intervention of interest mantra meditation, yoga, tai chi, chi gong, Dialectical Behavioural Therapy (DBT), Transcendental meditation, Acceptance and Commitment Therapy (ACT), Cognitive Behavioural Stress Management (CBSM), or Integrative Body-Mind Training (IBMT)?**   - If yes, exclude. - If no, and intervention still unclear continue intervention assessment.   **iii) Does the intervention involve: 1) grounding oneself in the present moment, and 2) acceptance/openness to experience?**   - If yes, continue intervention assessment. - If no, exclude.   **iv) Is the intervention at least 2 weeks in length?**   - If yes, go to control assessment. - If no, exclude. |  |
| **4. CONTROL**  **Is the comparator a passive-control** (wait-list control, no intervention**), active control** (i.e. relaxation, other meditation technique, health education group)**, or a psychotherapeutic/behavioural intervention** (i.e. CBT, DBT, IBMT, CBSM, IBMT, ACT)**?**   - If yes, continue to outcome assessment. - If only comparator is psycho-pharmacotherapy, (versus mindfulness without psycho-pharmacotherapy), exclude. - If no, exclude. |  |
| **5. OUTCOME**  **Is there a psychological outcome on:**   - **Anxiety symptoms** - **Depressive symptoms** - **Sleep parameters** - **Perceived stress** - **Emotion regulation** - **Substance use frequency** - If yes, include. - If no, exclude. |  |

## Section 5: Data Extraction Content

**All data was tracked in excel for two reviewers*

- **Study ID** (first author name and year)
- **Demographic Data** (sample size, type of student, if any psychiatric criteria was used, %females, mean age, country)
- **Risk of bias assessment** (all domains with judgment and quote)
- **Intervention Description** (name, length, mode of delivery)
- **Comparison Description** (name, length, mode of delivery, if co-intervention existed between both intervention and control groups)
- **Outcomes** (outcome of interest, measurement used, time of follow-up, %lost to follow-up, was ITT used, final value [change score or post-score], standard deviation, and total people included in analysis in the intervention and control groups)
- **Author’s findings** (to compare to our study findings for accuracy)
- **Other Comments**

## Section 6: Effective Sample Size Calculations

**Design Effect (DE) =** 1+(m-1)*(ICC)

**Effective Sample Size** = #participants/DE

|  | ICC=0.05 |
| --- | --- |
| DE  6 groups, 7 students per group | 1.3 |
| Intervention  n=42 | Effective Sample Size  **n=32** |
| Control  n=43 | Effective Sample Size  **n=33** |

**Reference for Appendix F:**

Guyatt, G. H., Oxman, A. D., Kunz, R., Brozek, J., Alonso-Coello, P., Rind, D., ... & Jaeschke, R. (2011). GRADE guidelines 6. Rating the quality of evidence—imprecision. *Journal of clinical epidemiology*, *64*(12), 1283-1293.

## Section 7: Back-Transformations (Scales)

| Scale | Description of Scale | Description of sample | SD | Minimal clinically important differences |
| --- | --- | --- | --- | --- |
| Beck Depression Inventory II (BDI) | 21-item self-report measure of symptoms of depression. Items are assessed on a likert scale from 0 (lowest severity) to 3 (highest severity) and summed for a total score, where higher scores reflect greater severity of symptoms (Beck, Steer, & Bargin, 1988). | 229 university students 17-29 years of age (Segal *et al,* 2008). | 8.32 (Segal *et al,* 2008 | We only found one study that reported minimal clinically important differences on the BDI in a Japanese clinical sample; this study indicated an MID of 5-points (Hiroe *et al.,* 2005). |
| Beck Anxiety Inventory (BAI) | 21-item self-report measure of symptoms of anxiety. Items are assessed on a likert scale from 0 (lowest severity) to 3 (highest severity) and summed for a total score, where higher scores reflect greater severity of symptoms (Beck, Epstein, Brown, & Steer, 1988) | 729 adults 18-90 years of age (Crawford *et al.*, 2011). | 7.16 (Crawford *et al.*, 2011). | We did not find any documented MIDs for the BAI. |
| Perceived Stress Scale (PSS)7 | 10-item self-report questionnaire, where higher scores reflect more stress. Items are scored on a 5-point likert severity scale from 0 to 4 (Cohen, Kamarck, & Mermelstein, 1983). | 645 young adults 18-29 years of age and 750 middle aged adults 30-44 years of age (Cohen, Kamarck, & Mermelstein, 1983). | 6.2 (Cohen, Kamarck, & Mermelstein, 1983) | No MID was found for the PSS. |

**References for Appendix G:**

Beck, A. T., Epstein, N., Brown, G., Steer, R. A. (1988). An inventory for measuring clinical anxiety: Psychometric properties. Journal of Consulting and Clinical Psychology, 56, 893-897.

Beck, A. T., Steer, R.A., & Garbin, M.G. (1988) Psychometric properties of the Beck Depression Inventory: Twenty-five years of evaluation. *Clinical Psychology Review,* 8(1), 77-100.

Cohen, S., Kamarck, T., and Mermelstein, R. (1983). A global measure of perceived stress. Journal of Health and Social Behavior, 24, 386-396.

Crawford, J., Cayley, C., Lovibond, P. F., Wilson, P. H., & Hartley, C. (2011). Percentile Norms and Accompanying Interval Estimates from an Australian General Adult Population Sample for Self‐Report Mood Scales (BAI, BDI, CRSD, CES‐D, DASS, DASS‐21, STAI‐X, STAI‐Y, SRDS, and SRAS). *Australian Psychologist*, *46*(1), 3-14.

Hiroe, T., Kojima, M., Yamamoto, I., Nojima, S., Kinoshita, Y., Hashimoto, N., ... & Furukawa, T. A. (2005). Gradations of clinical severity and sensitivity to change assessed with the Beck Depression Inventory-II in Japanese patients with depression. *Psychiatry research*, *135*(3), 229-235.

Segal, D. L., Coolidge, F. L., Cahill, B. S., & O'Riley, A. A. (2008). Psychometric properties of the Beck Depression Inventory—II (BDI-II) among community-dwelling older adults. *Behavior Modification*, *32*(1), 3-20.

## Section 8: Optimal Information Size

The optimal information size was calculated to help determine the precision of the pooled estimates. We used G*Power to calculate adequately powered sample sizes for calculating t-tests of differences between two independent means using a range of potential cohen d’s. Since Although RevMan calculates a Hedges’ adjusted g to quantify the standardized mean difference, this is similar to cohen’s d but just adjusts for small sample bias.

For calculations we used a two-sided t-test with an a=0.05 and *B*=0.1.

| d=0.2 | Optimal information size |
| --- | --- |
| 0.2 | 1302 |
| 0.25 | 834 |
| 0.3 | 580 |
| 0.35 | 428 |
| 0.4 | 328 |
| 0.45 | 260 |
| 0.5 | 210 |

**References for Appendix H:**

Cohen, J. (1988). Statistical power analysis for the behavioral sciences (2nd ed.). Hillsdale, NJ: Lawrence Earlbaum Associates.

Deeks, J.J. & Higgins, J.P.T. (2010). Statistical algorithms in Review Manager 5. Statistical Methods Group of The Cochrane Collaboration.

Faul, F., Erdfelder, E., Lang, A.-G., & Buchner, A. (2007). G*Power 3: A flexible statistical power analysis program for the social, behavioral, and biomedical sciences. *Behavior Research Methods*, *39*, 175-191.

**Section 9: References of Key Excluded and Ongoing Studies**

### References of Ongoing Studies

El Morr, C., Ahmad, F., Ritvo, P. (2017). Mindfulness virtual and face-to-face approaches for student mental health: A randomized controlled trial. Retrieved from: https://www.isrctn.com/ISRCTN92827275?q=&filters=conditionCategory:Mental%20and%20Behavioural%20Disorders,recruitmentCountry:Canada&sort=&offset=1&totalResults=78&page=1&pageSize=10&searchType=basic-search

- No data available at this time.

Flett , J., Patterson, T. (2016). Mobile Mindfulness Meditation as an Adjunct to Treatment-as-usual: A Randomised Controlled Trial. Retrieved from: http://apps.who.int/trialsearch/Trial2.aspx?TrialID=ACTRN12616000634471

- Not yet recruiting.

Galante J, Dufour G, Benton A, Howarth E, Vainre M, Croudace TJ, et al. Protocol for the Mindful Student Study: a randomised controlled trial of the provision of a mindfulness intervention to support university students' well-being and resilience to stress. BMJ open [Internet]. 2017; 6(11) (no pagination). Available from: <http://onlinelibrary.wiley.com/o/cochrane/clcentral/articles/358/CN-01245358/frame.html.>

- No available data, just finished data collection.

Kuhlmann, S. M., Burger, A., Esser, G., & Hammerle, F. (2015). A mindfulness-based stress prevention training for medical students (MediMind): Study protocol for a randomized controlled trial. *Trials, 16*(1). Retrieved from <http://onlinelibrary.wiley.com/o/cochrane/clcentral/articles/343/CN-01077343/frame.html> doi:10.1186/s13063-014-0533-9

- Protocol for Kuhlmann 2016.
- No other studies have been published from this protocol.
- Trialists still following participants for a 5-year follow-up.

***Protocols***

Branstrom, R. (2015). Internet-based Stress Reduction Training for Students (IBSR-stud) [protocol]. Retrieved from:https://clinicaltrials.gov/ct2/show/NCT02062762

- 8 week program
- Unable to locate publication and did not hear back from trialists
- States completed March 2015 on clinical trials

Klein, B. (2012) Randomised controlled trial of a fully automated online mindfulness program focussing on 18-25 Australian Tertiary Education students [protocol]. Retrieved from: https://www.anzctr.org.au/Trial/Registration/TrialReview.aspx?ACTRN=12610000833066

- Unable to locate publication. Attempted to contact trialists.
- Student Honours project

## References of Key Excluded Studies

Astin, J. A. (1997). Stress reduction through mindfulness meditation. Effects on psychological symptomatology, sense of control, and spiritual experiences. *Psychotherapy and Psychosomatics, 66*(2), 97-106. Retrieved from <http://onlinelibrary.wiley.com/o/cochrane/clcentral/articles/441/CN-00138441/frame.html>

- The author no longer has access to any of the raw data.
- Scores reported as cumulative Hopkins SCL-90-R so not used in narrative synthesis.

de Bruin, E. I., van der Zwan, J. E., & Bogels, S. M. (2016). A RCT Comparing Daily Mindfulness Meditations, Biofeedback Exercises, and Daily Physical Exercise on Attention Control, Executive Functioning, Mindful Awareness, Self-Compassion, and Worrying in Stressed Young Adults. *Mindfulness, 7*(5), 1182-1192.

- From email correspondence with trialists: Only 50% post-secondary students in the sample

Fulton, M. A. (1990). *The effects of relaxation training and meditation on stress, anxiety, and subjective experience in college students.* (9016622 Ph.D.), Lehigh University, Ann Arbor. ProQuest Dissertations & Theses A&I database.

- Has been included in previous systematic reviews of mindfulness interventions
- Describes a meditation intervention but does not have a specific mindfulness component.

Hindman RK, Glass CR, Arnkoff DB, Maron DD. A comparison of formal and informal mindfulness programs for stress reduction in university students. Mindfulness. 2015;6(4):873-84.

1. Hindman RK. A comparison of mindfulness-based programs for stress in university students. Dissertation Abstracts International: Section B: The Sciences and Engineering. 2014;75(2-B(E)):No Pagination Specified.
2. Hindman RK. Personal communication. 18th March 2017.

- Consider quasi-randomized

Jain, S., Shapiro, S. L., Swanick, S., Roesch, S. C., Mills, P. J., Bell, I., & Schwartz, G. E. R. (2007). A randomized controlled trial of mindfulness meditation versus relaxation training: Effects on distress, positive states of mind, rumination, and distraction. *Annals of Behavioral Medicine, 33*(1), 11-21.

- Included in previous systematic reviews on mindfulness interventions
- The trialists no longer has access to raw data (file corrupted) and the publications only presents summative distress scores (not separated subscale scores)

Keng, S-L., Phang, C.K., & Oei, T.P.S. (2015). Effects of a Brief Mindfulness-based Intervention Program on Psychological Symptoms and Well-being among Medical Students in Malaysia: A Controlled Study*. International Journal of Cognitive Therapy, 8*(4), 335-350

- Included in previous systematic reviews on mindfulness interventions
- Not a randomized controlled trial

Mermelstein LC. A Brief Mindfulness Intervention to Decrease Binge Drinking among College Students: A Controlled Study [Ph.D.]. Ann Arbor: Ohio University; 2013.

1. Mermelstein LC. A brief mindfulness intervention to decrease binge drinking among college students: A controlled study. Dissertation Abstracts International: Section B: The Sciences and Engineering. 2015;76(5-B(E)):No Pagination Specified.

- Consider quasi-randomized

Prasek, A. (2016). Randomized controlled trial to evaluate a self-guided, Web-based mindfulness program for stress reduction and wellbeing promotion. *Dissertation Abstracts International: Section B: The Sciences and Engineering, 77*(3-B(E)), No Pagination Specified.

- From email correspondence with trialists: Only 45% of the sample was post-secondary students

**Section 10: Characteristics of Included Studies**

Detailed demographic and intervention information for each included study. The Risk of Bias assessment for each study is explained in detail.

| Author, Year | | Aeamla-Or, 2015 (Thailand) *(unpublished dissertation)* | | |
| --- | --- | --- | --- | --- |
| Methods | | Randomized Controlled Trial | | |
| Participants | | 127 first and second year nursing students with not history of mental illness at the University of Phayao (mean age=19.03; 91% females). | | |
| Interventions | | MBSR  The intervention consisted of 8 weekly, 2.5-hour group sessions and one 7.5-hour full-day silent mindfulness session, conducted during the sixth week of the program. Participants were expected to engage in 45 minutes per day of formal mindfulness practices, and various informal practices of approximately 5-15 minutes duration. | | |
| Comparator | | No Intervention Control | | |
| Outcomes of interest | | Post intervention, 8 weeks post intervention, 16 weeks post intervention   - Depression: measured with the CES-D scale - Stress: Measured with the PSS | | |
| Author’s Conclusions | | There was a reduction in stress as a result of the intervention, but no effect was observed in depressive symptoms. | | |
| Notes | |  | | |
| Risk of Bias | | | | |
| **Random Sequence Generation** (selection bias) | | Low | | Quote: *“They were then randomly assigned into either an experimental group or a control group by a biostatistician of the University of Newcastle, who was not involved in participant recruitment. A randomisation sequence was created using Stata V13 (Statacorp, College Station, TX), and allocation of the participants was undertaken using a randomised block design with blocks of size two and four. This design was used to ensure that the number of participants were equally distributed among the study groups (Hulley et al., 2013).”*  Comment: There was a random component to sequence generation. |
| **Allocation concealment** (selection bias) | | Low | | Quote: "*Participants were randomly allocated by a biostatistician of the University of Newcastle, who was not involved in participant recruitment. The details of the allocated group based on participants’ student identification numbers were then returned to the researcher, who sent these to research assistant A."*  Comment: Someone other than the primary investigator conducted the randomization and randomization as done based on student numbers, limiting the risk of selection bias. |
| **Blinding of participants and personnel** (performance bias) | | High | | Quote: *"* *the participants involved in the study and the researcher were aware of the group allocations"*  Comment: Blinding is difficult due to nature of the intervention; blinding is only possible in a behavioural intervention if a sham intervention is provided where participants are unable to determine if they are in the treatment or comparison group. Therefore, since one of the comparisons was a no-intervention control (not a sham intervention), risk of performance bias is high. |
| **Blinding of outcome assessment** (detection bias) | | High | | Comment: Even though those involved in data collection and analysis were blinded to group allocation, since outcomes are self-report and participants were not blinded to group assignment, there is a risk of detection/participant ascertainment bias and recall bias. |
| **Incomplete outcome data** (attrition bias) | | Low | | Comment: In this RCT, there was a 0.78% (1 of 127) attrition rate with all but one participant providing data at all measurement points. This attrition rate was lower than those reported in previous studies. |
| **Selective reporting** (reporting bias) | | Low | | Quote: “*The trial was prospectively registered with the International Standard Registered Clinical/soCial sTudy Number (www.controlled-trials.com/ISRCTN62401721) where all the trial outcomes and analysis reported in this thesis were pre-specified.”*  Comment: There is no reason to suspect selective reporting. |
| **Other bias** (non-compliance) | | Low | | Comment: Classes were well attended and there was no comment about noncompliance. |
| Author, Year | | Blevins 2008 (US) (published) | | |
| Methods | | Randomized Controlled Trial | | |
| Participants | | 41 students with BMI greater than 25 (without a diagnosis of bulimia). (mean age=20.7; 100% females). | | |
| Interventions | | Standard Treatment plus Mindfulness (MBT)  The intervention was 8 weeks in length. Participants met once a week for 2-hour group sessions. Homework and out of class session work was required including daily mini-meditations. | | |
| Comparator | | Standard Behavioural Treatment (SBT)  Participants were instructed to follow a low calorie, low-fat diet. Additionally they were taught goal setting, self control, stimulus control etc. 30 min a day of physical activity was recommended, and instructions were provided for a proper exercise routine. | | |
| Outcomes of interest | | Post-intervention and 3 months   - Depression Symptoms: measured with the Beck Anxiety Inventory - Anxiety Symptoms: measured with the State Anxiety Scale | | |
| Author’s Conclusions | | *"Both treatment conditions produced equivalent results with regard to changes in body image satisfaction, psychological functioning, binge eating, and weight management. Table 3-7 provides an illustration of the areas of improvement as a result of treatment. Contrary to 57 58 prediction, standard behavioral treatment plus mindfulness did not produce significantly greater improvements than standard treatment alone."* | | |
| Notes | |  | | |
| Risk of Bias | | | | |
| **Random Sequence Generation** (selection bias) | | Low | | Comment: Enrolled participants were then stratified based on a BMI median split and randomized into one of two treatment conditions using an online random sequence generator. |
| **Allocation concealment** (selection bias) | | High | | Comment: No comment about who conducted the randomization and if the randomization sequence was open. |
| **Blinding of participants and personnel** (performance bias) | | High | | Comment: There was no comment in the article about blinding, therefore, it was assumed participants were not blinded and risk of performance bias is high. |
| **Blinding of outcome assessment** (detection bias) | | High | | Comment: Individuals administering the intervention/control were not blinded to which was which as all met to discuss and plan the sessions. There is no mention of where those conducting data analysis were blinded |
| **Incomplete outcome data** (attrition bias) | | High | | Comment: 9 participants lost to follow up in treatment and 9 in control. Although this was equal loss in total, the rate of drop out at each time point was not equivalent across conditions. There was also over 20% loss to follow-up and therefore this study was rated as high risk of attrition bias. |
| **Selective reporting** (reporting bias) | | Low | | Comment: No trial registration or protocol was found online, although there were no inconsistencies within the paper to suggest measures reported were different than those intended to be reported at the beginning of the study. |
| **Other bias** (non-compliance) | | Low | | Quote: “Only 25% reported participating in meditation practice outside of group at least one time over the 6-week period, and only one participant completed her meditation assignment every week.”  Comment: While non-compliance bias was not mentioned in the conclusion of the essay, the authors recommend that future studies better recognise the need for high levels of compliance. But this was already accounted for in loss to follow up. |
| Author, Year | | Bohecker, 2016 (US) (published and unpublished) | | |
| Methods | | Randomized Controlled Trial | | |
| Participants | | 22 1st semester counsellors-in-training enrolled in group counseling course (mean age=28.7; 72.7% females) | | |
| Interventions | | Mindfulness Experiential Small Group curriculum  The curriculum consisted of three phases: mindful orientation, mindful awareness, mindful application. The intervention 8 weeks in duration with 1.5-hour sessions, which included psychoeducational modules and related mindfulness experiential activities. 2 treatment groups; one facilitated by first year doctoral students, another facilitated by 2nd year doctoral students. No daily practice was required. | | |
| Comparator | | Active Control  No mindfulness related intervention or discussions. No specific curriculum. For 8 weeks, students merely were given the opportunity to process any professional or personal issues they were currently experiencing. | | |
| Outcomes of interest | | Post-intervention:   - Perceived Stress: measured with the Perceived Stress Scale | | |
| Author’s Conclusions | | - There was no significant differences in perceived stress between the treatment and control groups | | |
| Notes | | Received mean and standard deviation for post-intervention perceived stress scores obtained through personal communication as only significance of results was reported. | | |
| Risk of Bias | | | | |
| **Random Sequence Generation** (selection bias) | | Low | | Comment: A numerical identifier was assigned to each participant. The numbers were entered into Research Randomizer v 4.0 computer software to provide random assignment of each participant into one of the four groups. |
| **Allocation concealment**(selection bias) | | Low | | Comment: Since a numerical identifier was assigned to each participant, the individual performing the randomization would have been blinded to group allocation. |
| **Blinding of participants and personnel** (performance bias) | | Low | | Comment: “*Depending on which group they were assigned, participants were given an envelope containing pretest instruments with a demographic questionnaire (TG1 and CG1) or an envelope with only the demographic questionnaire (TG2 and CG2).”* This statement suggests participants were blinded to their group allocation. Since the control group was an active control or a sham-intervention, it is plausible to assume participants were blinded. |
| **Blinding of outcome assessment** (detection bias) | | Low | | Comment: Although there was no specific comment in the article, since this study uses self-report instruments and we are assuming participants were blinded to group assignment, we are assuming low risk of detection/participant ascertainment bias. Participants also were unaware of the direct variables under study. |
| **Incomplete outcome data** (attrition bias) | | Low | | Comment: There was no mention of loss to follow up and all participants were included in the final analysis. Therefore, we assumed low risk of attrition bias. |
| **Selective reporting** (reporting bias) | | Low | | Comment: Researchers used a Solomon design, reported all results for pretest sensitivity. No trial registration or protocol was found online, although there were no inconsistencies within the paper to suggest measures reported were different than those intended to be reported at the beginning of the study. |
| **Other bias** (non-compliance) | | Low | | Comment: It appears that all recruited participants completed the study. They also conducted a manipulation check because *"participants might engage in discussion of different treatment formats, potentially influencing the post-test scores and assessment of treatment and control groups."* No reason to suspect other biases. |
| Author, Year | | Burger, (UK) | | |
| Methods | | Randomized Controlled Trial | | |
| Participants | | 52 pre-licensure registered nursing students. | | |
| Interventions | | Mindfulness Meditation  Online training followed by 4 weeks of daily mindfulness meditation. | | |
| Comparator | | No Intervention Control | | |
| Outcomes of interest | | Post-Intervention   - Stress: PSS | | |
| Author’s Conclusions | | “After four weeks of meditation, participants in the MM group scored higher in mindfulness characteristics and lower in perceived stress than control group participants who did not meditate.” | | |
| Notes | | Unable to access full article. Author contacted and library of relevant University contacted with no success. Results from abstract used for narrative synthesis. | | |
| Author, Year | | Call, 2014 (UK) (published) | | |
| Methods | | Randomized Controlled Trial | | |
| Participants | | 120 female undergraduate psychology students (mean age=22.73; 100% females) that had at least moderate levels of worry on the Penn State Worry Questionnaire. | | |
| Interventions | | 1. MBSR hatha yoga 2. MBSR body scan   Both interventions lasted 3 weeks. The interventions included 45-minute weekly in-person group sessions guided by pre-recorded practices. Home practice was not required and participants were not given any audio recordings. | | |
| Comparator | | Wait-list control | | |
| Outcomes of interest | | Post-intervention:   - Anxiety symptoms: measured with the DASS - Stress: measured with the DASS | | |
| Author’s Conclusions | | - The paper conducted analyses controlling for pre-test anxiety and stress (since different between groups at baseline). When controlling for baseline scores, both interventions resulted in significant reductions in anxiety and stress but there nonsignificant differences between the intervention groups. | | |
| Notes | |  | | |
| Risk of Bias | | | | |
| **Random Sequence Generation** (selection bias) | Low | | Quote: *"Randomly assigned"*  Comment: Although the random component of assignment was not described in detail, the authors did indicate random assignment was done and there is no reason to believe they did not conduct randomization. | |
| **Allocation concealment**(selection bias) | High | | Comment: The randomization procedure was not described. | |
| **Blinding of participants and personnel** (performance bias) | High | | Comment: There was no comment in the article about blinding. Therefore, since the comparison was wait-list control (not a sham intervention), and there was no comment about blinding, it was assumed participants were not blinded and risk of performance bias is high. | |
| **Blinding of outcome assessment** (detection bias) | High | | Comment: There was no comment in article about blinding of outcome assessment. Since outcomes are self-report and participants were not blinded to group assignment, there is a risk of detection/participant ascertainment bias and recall bias. | |
| **Incomplete outcome data** (attrition bias) | High | | Quote: "*120 women were scheduled to participate in the experimental brief mindfulness sessions or control condition.”*  *“Of those participants included in the final analysis (N=91)”*  Comment: The group assignment of excluded participants was not explicitly discussed in the article. However, if we assume 120 participants were *"randomly assigned to one of three equally distributed conditions"*, each group should have 40 participants. Therefore, we can assume 5(12.5%) were lost from the control group, 11(27.5%) from the hatha yoga group, and 13(32.5%) from the body scan group based on the number of participants included in the analysis. Since more than 20% of participants were lost to follow up in both interventions groups and loss was differential across conditions, this was considered high risk of attrition bias. | |
| **Selective reporting** (reporting bias) | Low | | Comment: The study protocol is not available online (i.e. not cited in the study, registered on ClinicalTrials.gov or the WHO portal, and not found through a Google Search), although there were no inconsistencies within the paper to suggest measures reported were different than those intended to be reported at the beginning of the study. | |
| **Other bias** (non-compliance) | Low | | Non-compliance: “*Those participants who completed fewer than two experimental sessions or did not fully complete questionnaire items were excluded from the present analysis.”*In regards to compliance, participants who completed fewer than two sessions were excluded from analysis and contribute to attrition bias but they did not contribute separately to non-compliance bias. | |
| Author, Year | Cavanagh, 2013 (UK) (published) | | | |
| Methods | Randomized Controlled Trial | | | |
| Participants | 104 university students (mean age=24.7; 88% females) | | | |
| Interventions | Learning Mindfulness Online  Intervention lasted 2 weeks. The intervention was all online delivered via daily pre-recorded 10-minute mindfulness meditation sessions. | | | |
| Comparator | Wait-list control | | | |
| Outcomes of interest | Post-intervention:   - Perceived Stress: Measured with the PSS | | | |
| Author’s Conclusions | - Scores in the wait-list control group remained unchanged over time and there was a significant decrease in perceived stress scores for the intervention group. - The study did not report on between group differences, just within. | | | |
| Notes |  | | | |
| Risk of Bias | | | | |
| **Random Sequence Generation** (selection bias) | Low | | Quote: *"…participants were randomised, using a computer-generated blocked random allocation method, to either start the intervention immediately or to a wait-list control:”*  Comment: The investigators describe a random component in the sequence generation process (computer generated). | |
| **Allocation concealment**(selection bias) | High | | Quote: *“Within 24hr of completing the baseline questionnaires, participants were randomised, using a computer-generated blocked random allocation method, to either start the intervention immediately or to a wait-list control:”*  Comment: No comment was made regarding who performed the randomization, how large the blocks were for randomization, or if there were any concealment procedures. | |
| **Blinding of participants and personnel** (performance bias) | High | | Comment: There was no comment in the article about blinding. Blinding is difficult due to nature of the intervention. Therefore, since the comparison was wait-list control (not a sham intervention), and there was no comment about blinding, it was assumed participants were not blinded and risk of performance bias is high. | |
| **Blinding of outcome** assessment (detection bias) | High | | Comment: There was no comment in article about blinding of outcome assessment. Since outcomes are self-report and participants were not blinded to group assignment, there is a risk of detection/participant ascertainment bias and recall bias. | |
| **Incomplete outcome data** (attrition bias) | High | | Quote: *"58 (52.3%) of participants completed questionnaires at pre- and post-intervention. There was a significant difference in completion rate across groups, with 35 (70%) in the waitlist group and 23 (42.6%) in the mindfulness intervention group completing the post-intervention questionnaire."*  *"Study attrition, and attrition from the intervention group in particular, were high in this study."*  Comment: Reason for missing outcome data has the potential to be related to true outcome, with significant imbalance in numbers for missing data across intervention groups. Since more than 20% of participants in all groups were lost to follow-up, and more individuals were lost from the intervention group, there was a high risk of attrition bias. | |
| **Selective reporting** (reporting bias) | Low | | Comment: The study protocol is not available online (i.e. not cited in the study, registered on ClinicalTrials.gov or the WHO portal, and not found through a Google Search), although there were no inconsistencies within the paper to suggest measures reported were different than those intended to be reported at the beginning of the study. Although the study did not report on between group differences in stress, there was enough data reported to compare groups for the meta-analysis (i.e. post-score mean and SDs of both groups). | |
| **Other bias** (non-compliance) | Low | | Non-compliance:*“20 (87%) of participants who completed post-intervention measures reported practicing more than once a week (61%) or more than once a day (26%), and only 1 (4%) participant reported that they has not practiced mindfulness at all.”* Since noncompliance did not exceed 30% (i.e. compliance levels were acceptable for those completing post-intervention measure), this is judged as low risk of bias. | |
| Author, Year | | Danilewitz, 2016 (Canada) (published) | | |
| Methods | | Randomized Controlled Trial | | |
| Participants | | 30 Pre-clerk ship medical students at the University of Ottawa (73.3% female) | | |
| Interventions | | Mindfulness meditation program (MMP)  The intervention was 8 weeks in duration and consisted of 1-1.5 hour weekly sessions. Weekly homework was incorporated into the program including daily meditation exercises. The program was delivered in person. The intervention used was specifically designed for medical students. Session themes addressed core issues that face medical students including work life balance, dealing with patient suffering, being mindful in clinical interactions, dealing with the need to be perfect, and self-acceptance | | |
| Comparator | | Wait-list control group | | |
| Outcomes of interest | | Post-intervention:   - Depressive symptoms: measured with DASS - Anxiety: measured with DASS - Stress: measured with DASS | | |
| Author’s Conclusions | | *"Results suggest an 8-week peer-led mindfulness based intervention is acceptable to pre-clerkship medical students and may improve wellbeing and aspects of professionalism for those who express interest in such an intervention"* | | |
| Notes | |  | | |
| Risk of Bias | | | | |
| **Random Sequence Generation** (selection bias) | | Low | | Comment: Participants were “*randomized.”* Although the random component of assignment was not described in detail, the authors did indicate random assignment was done and there is no reason to believe they did not conduct randomization. |
| **Allocation concealment**(selection bias) | | High | | Comment: No comment about who conducted the randomization and if the randomization sequence was open. |
| **Blinding of participants and personnel** (performance bias) | | High | | Comment: There was no comment in the article about blinding. Blinding is difficult due to nature of the intervention; blinding is only possible in a behavioural intervention if a sham intervention is provided where participants are unable to determine if they are in the treatment or comparison group. Therefore, since one of the comparisons was wait-list control (not a sham intervention), and there was no comment about blinding, it was assumed participants were not blinded and risk of performance bias is high. |
| **Blinding of outcome assessment** (detection bias) | | High | | Comment: There was no comment in article about blinding of outcome assessment. Since outcomes are self-report and participants were not blinded to group assignment, there is a risk of detection/participant ascertainment bias and recall bias. |
| **Incomplete outcome data** (attrition bias) | | High | | Comment: Nine (60%) participants completed four or more sessions. Among participants who dropped out early (n=6; 40%) one did not start the program, 4 dropped out after session 2 and one dropped out after session 3. Post-study assessments were completed by 80% (n=13) of MMP and 60% (n=9) of WL participants. Therefore, there was over 20% lost to follow up and differential losses between groups resulting in a high risk of attrition bias. |
| **Selective reporting** (reporting bias) | | Low | | Comment: No trial registration or protocol was found online, although there were no inconsistencies within the paper to suggest measures reported were different than those intended to be reported at the beginning of the study. |
| **Other bias** (non-compliance) | | High | | Comment: Only 4 participants reported full compliance to homework. |
| Author, Year | Davis, 2013 (US) (published) | | | |
| Methods | Randomized Controlled Trial | | | |
| Participants | 55 community college students (mean=21.9; 29.1% female) who smoked 10 or more cigarettes per day and had 5 or more ‘binges’ per month (without showing dependence or binge drinking 6 or more nights per week). A binge was defined as 5 or more alcohol drinks per day for males and 4 or more drinks for females. | | | |
| Interventions | Mindfulness Training for Smoking  The intervention lasted 6 weeks. The intervention consisted of weekly 2-hour classes involving 45 minutes of instruction from a trained psychology master’s student, followed by 45 minutes of group discussion, and ending with 30 minutes of mindfulness practice. There was also a 7-hour Quit Day Retreat and 30 minutes of daily practice. | | | |
| Comparator | Interactive Learning for Smokers  The intervention was set up identically to the Mindfulness Intervention, but the practice consisted of non-directed walking (walking silently and alone without music or a goal destination) for 30 minutes at the end of group and each day independently. | | | |
| Outcomes of interest | Post-Intervention:   - Smoking cessation: Measured through timeline follow back to report daily use of smoking. Abstinence was confirmed with biomedical testing via carbon monoxide breath testing. | | | |
| Author’s Conclusions | - Point prevalence of smoking abstinence was higher in the mindfulness group than the control group, although the difference was not statistically significant (OR[CI]=6.00[0.67, 53.68; p=0.08). The Mindfulness group also showed a significantly greater number of days abstinent in the first two weeks than the control group (MTS mean[SD]=5.1[6], ILS=2.04[3.98]; p=0.03).   Overall: the findings demonstrated a trend towards favouring the mindfulness group, but no statistically significant findings. Both groups had a very high attrition rate, although those that did complete the intervention had acceptable attendance and homework completion. | | | |
| Notes | Narrative Review | | | |
| Risk of Bias | | | | |
| **Random Sequence Generation** (selection bias) | Low | | Quote: *"Subjects were randomized into either Mindfulness Training for Smokers (MTS) or the control condition "Interactive Learning for Smokers" (ILS) by random draws"*  Comment: The investigators describe a random component in the sequence generation process (random draws). | |
| **Allocation concealment**(selection bias) | Low | | Comment: Although the study did not explicitly say who performed randomization, ‘random draws’ would not be an open allocation procedure, minimizing risk of bias. | |
| **Blinding of participants and personnel** (performance bias) | Low | | Quote: *"Descriptions of the two interventions and other processes were provided in such a way so as to decrease the possibility that controls might know they had been randomized to a control arm."*  Comment: The investigators took measures to minimize the risk of performance bias by not revealing which intervention was the control. | |
| **Blinding of outcome** assessment (detection bias) | Low | | Comment: Substance use outcomes were assed via self-report, however, participants were blinded to intervention/control group assignment minimizing the risk of ascertainment bias. Also, smoking abstinence was confirmed through biomedical testing, further minimizing biased outcome assessment. | |
| **Incomplete outcome data** (attrition bias) | High | | Quote: *“Attrition for all participants from randomization to assessment visit was 55% with no significant differences between groups (MTS=50%, ILS Controls=60%).*  Comment: Attrition bias was judged as high risk of bias since attrition greatly surpassed and although there were not significant differences between amount lost to follow up, the reasons for loss to follow-up were not provided (i.e. unsure if non-compliance bias or attrition bias). | |
| **Selective reporting** (reporting bias) | Low | | Comment: The study protocol is not available online (i.e. not cited in the study, registered on ClinicalTrials.gov or the WHO portal, and not found through a Google Search), although there were no inconsistencies within the paper to suggest measures reported were different than those intended to be reported at the beginning of the study. | |
| **Other bias**(non-compliance) | Low | | Non-compliance: Participations meditated for an average of 24.41minutes per day although overall compliance was not reported. Unsure if ‘non-completers’ resulted in non-compliance or attrition. We deemed ‘Non-completers’ to only contribute to attrition bias and not non-compliance bias. | |
| Author, Year | Delgado, 2015 (Spain) (published) | | | |
| Methods | Randomized Controlled Trial | | | |
| Participants | 45 university students (mean age=21.5; 100%females) with high scores on the Penn State Worry Questionnaire without Generalized Anxiety Disorder or treatment at this time. | | | |
| Interventions | 1. Mindfulness Cognitive Training Group 2. Mindfulness Interoceptive Training Group   The intervention lasted 3 weeks and consisted on two 1-hour guided group sessions per week. The cognitive group focused on mental processes during meditation while the interoceptive group focused on body sensations. Daily home practice was encouraged but there was no structured homework. | | | |
| Comparator | No-intervention control group | | | |
| Outcomes of interest | Post-intervention:   - Depressive symptoms: Measured with the Beck Depression Inventory. - Anxiety: Measured with the Penn State Worry Questionnaire. - Stress: Measured with the Perceived Stress Scale. | | | |
| Author’s Conclusions | The outcomes were analyzed as differences in change scores(i.e. difference between pre and post intervention measures).   - The mindfulness interoceptive group demonstrates significantly lower anxiety and depressive symptoms than the control group. - The mindfulness cognitive group had significantly lower depressive symptoms than did the control group. - No significant differences were found between the two intervention groups on depression, stress, or anxiety outcomes. - No significant differences in perceived stress. | | | |
| Notes |  | | | |
| Risk of Bias | | | | |
| **Random Sequence Generation** (selection bias) | Low | | Quote: *"Participants were randomly assigned."*  Comment: Although the random component of assignment was not described in detail, the authors did indicate random assignment was done and there is no reason to believe they did not conduct randomization. | |
| **Allocation concealment** (selection bias) | High | | Comment: The randomization procedure not described. | |
| **Blinding of participants and personnel** (performance bias) | High | | Comment: There was no comment in the article about blinding. Blinding is difficult due to nature of the intervention. Therefore, since the comparison was a no intervention control (not a sham intervention), and there was no comment about blinding, it was assumed participants were not blinded and risk of performance bias is high. | |
| **Blinding of outcome** assessment (detection bias) | High | | Comment: There was no comment in article about blinding of outcome assessment. Since outcomes are self-report and participants were not blinded to group assignment, there is a risk of detection/participant ascertainment bias and recall bias. | |
| **Incomplete outcome data** (attrition bias) | High | | Quote: “*Four participants (three in the mindfulness cognitive training group and one in the control group) discontinued participation.”*  Comment: Four participants (3[20%] in the mindfulness cognitive training group and 1 [7%] in the control group discontinued participation. Since the loss to follow-up was at 20% in one of the intervention groups, not similar across groups, attrition bias was considered high. | |
| **Selective reporting** (reporting bias) | Low | | Comment: The study protocol is not available online (i.e. not cited in the study, registered on ClinicalTrials.gov or the WHO portal, and not found through a Google Search), although there were no inconsistencies within the paper to suggest measures reported were different than those intended to be reported at the beginning of the study. | |
| **Other bias**(non-compliance) | Low | | Non-compliance: Apart from students who withdrew, it appears that all other students completed all three sessions and therefore non-compliance bias is judged as low. | |
| Author, Year | De Vibe, 2013/2015 (Norway) (published) | | | |
| Methods | Randomized Controlled Trial | | | |
| Participants | 288 medical and psychology students (mean=23.8; 76% females). | | | |
| Interventions | MBSR (adapted)  The intervention lasted 7 weeks including 1.5 hours sessions per week for 6 weeks that were guided by trained instructors and a 6 hour session during week 7. Participants were expected to practice daily at home for 30 minutes. | | | |
| Comparator | No intervention control group | | | |
| Outcomes of interest | Post-intervention   - Stress: measured with the perceived medical student stress scale. | | | |
| Author’s Conclusions | - The intervention did not significantly reduce student stress (comparing change scores). | | | |
| Notes | Data obtained through 2013 study and the 2015 study used the same sample of students and same outcome data. | | | |
| Risk of Bias | | | | |
| **Random Sequence Generation** (selection bias) | Low | | Quote: *"A computer program (a Java based random number generator) was used to randomly assign students to the intervention group or control group"*  Comment: The investigators describe a random component in the sequence generation process (computer random number generator). | |
| **Allocation concealment**(selection bias) | Low | | Comment: Although not explicitly described, the paper indicates a *"head technician at the Norwegian Knowledge Centre for the Health services assigned each participant an ID which was then assigned to their online questionnaires to ensure the data remained anonymous."* This suggests students were likely anonymously assigned based on ID or a third party may have conducted the group assignment. | |
| **Blinding of participants and personnel** (performance bias) | High | | Comment: There was no comment in the article about blinding. Blinding is difficult due to nature of the intervention. Therefore, since the comparison was a no-intervention control (not a sham intervention), and there was no comment about blinding, it was assumed participants were not blinded and risk of performance bias is high. | |
| **Blinding of outcome** assessment (detection bias) | High | | Comment: There was no comment in article about blinding of outcome assessment. Since outcomes are self-report and participants were not blinded to group assignment, there is a risk of detection/participant ascertainment bias and recall bias. | |
| **Incomplete outcome data** (attrition bias) | Low | | From Figure 1: 5(3.5%) participants in the intervention group and 7(5%) in the control group were lost to follow up for unknown reasons.  Quote*: “no significant differences in the demographic data or outcome measurements at baseline between those subjects participating and those dropping out at follow-up."*  Comment: Due to the low attrition and similar rates of attrition in both groups, attrition bias is judged as low. | |
| **Selective reporting** (reporting bias) | Low | | Comment: The study protocol is not available online (i.e. not cited in the study, registered on ClinicalTrials.gov or the WHO portal, and not found through a Google Search), although there were no inconsistencies within the paper to suggest measures reported were different than those intended to be reported at the beginning of the study. | |
| **Other bias**(non-compliance) | Low | | Non-compliance:*"Average attendance rate was 5.3 out of 7 sessions…formal practice 1.5 times a week on average, with an average duration of 13 minutes per session."* Since on average students attended >75% of the sessions, and rates of home practice are low across most studies of mindfulness interventions, this was deemed as low risk of non-compliance bias. | |
| Author, Year | | Dvorakova, 2017 (US) | | |
| Methods | | Randomized Controlled Trial | | |
| Participants | | 109 first year undergraduate students (mean age=18.2; 66% females). | | |
| Interventions | | L2B Program  The intervention included 8 sessions over six weeks. Each session lasted approximately 80 minutes. 2 sessions per week for the first 2 weeks and 1 session for each of the remaining 4 weeks). The program was delivered in person, and the goal of the program was to enhance emotion regulation skills, outside session practice was encouraged throughout the program but there were no daily practice requirements. | | |
| Comparator | | Wait List Control | | |
| Outcomes of interest | | Post-Intervention   - Depressive Symptoms: measured with the PHQ - Anxiety Symptoms: Measured with the GAD7 - Sleep: Measured with the Pittsburgh sleep quality index (higher scores reflect more dysfunction) - Alcohol use: How many times the student got drunk in the past month and how many drinks they had in a sitting when they got drunk. They also had an alcohol consequences questionnaire. | | |
| Author’s Conclusions | | *"Our findings suggest that the adapted L2B program which is designed as a universal prevention program could be offered as a part of a freshmen orientation class, as a residential hall program offering with additional incentives, or freestanding 6-week class that is offered only to freshman. Furthermore, we would recommend the possibility that L2B could be added as a prevention effort led by the health and counselling centers to decrease the occurrence of stress-related disorders"* | | |
| Notes | |  | | |
| Risk of Bias | | | | |
| **Random Sequence Generation** (selection bias) | | Low | | Quote: " *Since we had a predominantly female sample, the sample was stratified by gender and each group was randomized separately (using the https://www.randomizer.org/) to assure balanced number of males and females in the intervention and control group."* |
| **Allocation concealment**(selection bias) | | High | | Comment: Participants were informed of the assignment to program via email, which suggests that the allocation of participants was not concealed. |
| **Blinding of participants and personnel** (performance bias) | | High | | Comment: Participants were informed if they were enrolled in the study or placed on the wait list via email, therefore risk of performance bias was high. |
| **Blinding of outcome assessment** (detection bias) | | High | | Comment: There was no comment in article about blinding of outcome assessment. Since outcomes are self-report and participants were not blinded to group assignment, there is a risk of detection/participant ascertainment bias and recall bias. |
| **Incomplete outcome data** (attrition bias) | | Low | | Comment: Only about 10% of participants were lost to follow up during the study (1 lost from control and 3 lost from intervention group). Since loss to follow-up was less than 20%, this study was considered to have a low risk of attrition bias. |
| **Selective reporting** (reporting bias) | | Low | | Comment: The study protocol is not available online (i.e. not cited in the study, registered on ClinicalTrials.gov or the WHO portal, and not found through a Google Search), although there were no inconsistencies within the paper to suggest measures reported were different than those intended to be reported at the beginning of the study. |
| **Other bias** (non-compliance) | | Low | | Comment: Homework worksheets were included in the study, however no concerns were raised about non-compliance to the completion of the worksheets. |
| Author, Year | | Erogul, 2014 (US) | | |
| Methods | | Randomized Controlled Trial | | |
| Participants | | 58 first year medical students (mean age=23.5; 45.6% females). | | |
| Interventions | | MBSR intervention  The intervention consisted of 75-minute sessions once a week for 8 weeks, with one full day off site retreat. The program was delivered in person. The in-class sessions had two aims: first, to teach the experiential practices of mindfulness based meditation, body scan, and breathing-based yoga, and second, to provide a cognitive curriculum about understanding stress and how best to manage reactivity. These two components, the cognitive and the experiential, compose the typical MBSR program. Weekly handouts were used to illustrate concepts, and homework reflections were included. Homework included individual sessions of daily meditation for 20 minutes for the 8-week intervention. Initially these meditations started with the narrated guidance from 20-minute downloaded audio files: body scan, breath meditation, and gentle yoga. Each 20-minute track was an abbreviated version of the weekly 60-minute experience in mindfulness meditation and corresponded to the theme of the weekly meeting, reinforcing techniques used in class. After Week 4, the participants shifted from guided to self-meditation. The full-day retreat occurred offsite from 10 a.m. to 3 p.m. and had 100% attendance of the study participants. | | |
| Comparator | | Wait List Control | | |
| Outcomes of interest | | Post-intervention and 6 months:   - Stress: measured with the Perceived Stress Scale | | |
| Author’s Conclusions | | *"Our study demonstrates that an abridged 8-week MBSR curriculum can reduce perceived stress and improve self compassion in 1st-year medical students." The results of the study also showed that it persisted to up to 6 months after completion”* | | |
| Notes | |  | | |
| Risk of Bias | | | | |
| **Random Sequence Generation** (selection bias) | | Low | | Comment: The selection process involved using a random number generator to select students who had been numbered according to their alphabetical order in the class. |
| **Allocation concealment**(selection bias) | | Low | | Comment: Students were numbered according to their alphabetical order in the class.  Quote: “This process blindly allocated 30 students to control and 30 to intervention.” |
| **Blinding of participants and personnel** (performance bias) | | High | | Quote: *"This prospective unblinded randomized controlled study"*  Comment: the study refers to itself as an not blinded study. |
| **Blinding of outcome assessment** (detection bias) | | High | | Comment: The study stated participants were not blinded. Since outcomes are self-report and participants were not blinded to group assignment, there is a risk of detection/participant ascertainment bias and recall bias. |
| **Incomplete outcome data** (attrition bias) | | Low | | Comment: Only 3/30 participants were lost during the study. Participants could miss no more than one of the eight sessions, and presence at the retreat (as described in the intervention) was mandatory. Since less than 20% were lost to follow up, this study was considered low risk of attrition bias. |
| **Selective reporting** (reporting bias) | | Low | | Comment: The study protocol is not available online (i.e. not cited in the study, registered on ClinicalTrials.gov or the WHO portal, and not found through a Google Search), although there were no inconsistencies within the paper to suggest measures reported were different than those intended to be reported at the beginning of the study. |
| **Other bias** (non-compliance) | | Low | | Quote: “Among our study participants the mean meditation minutes per week was 40.7 (22.8), which is lower than the minimum requested commitment of 140 minutes per week in our study and far lower than the 315 minute per week commitment of the classic MBSR program. “  Comment: Compliance to at home portion of the intervention was not raised as a concern by the authors. |
| Author, Year | | Falsafi, 2016 (US) | | |
| Methods | | Randomized Controlled Trial | | |
| Participants | | 90 undergraduate students with a diagnosis of anxiety and/or depression (mean age= 22.1; 86.4% females). | | |
| Interventions | | 1) Mindfulness and Self Compassion Group  The intervention was 75 mins/week for 8 weeks. Participants learned mindfulness practices on breath, senses, self-compassion led by a clinical nurse specialist/certified yoga teacher. Participants also received a book on mindfulness, a thumb drive with soft music and audio guided meditations, as well as a journal to document their daily home practices. Participants were asked to practice learned modalities outside of class for 20 mins/day.  2) Hatha Yoga Group  Participants engaged in 75 minutes of gentle Hatha yoga poses and postures led by a clinical nurse specialist/certified yoga teacher. Participants also received a thumb drive with video and verbal instructions for their yoga practices for home practice. Particpants were asked to practice learned modalities outside of class for 20 mins/day. | | |
| Comparator | | No Intervention Control | | |
| Outcomes of interest | | Post-intervention and 1 month:   - Depressive Symptoms: measured with the Beck Depression Inventory - Anxiety: Measured with the Hamilton Anxiety Scale - Stress: Measured with the Student-Life Stress Inventory | | |
| Author’s Conclusions | |  | | |
| Notes | | This study also had a Hatha Yoga Group, which can sometimes be considered a mindfulness intervention. This study’s description of the Hatha Yoga group did not indicate any effort to ground oneself in the present moment or be open and accepting of experiences. Therefore, this intervention was not utilized in this review and meta-analysis. | | |
| Risk of Bias | | | | |
| **Random Sequence Generation** (selection bias) | | Low | | Quote: *"The students were assigned to one of three groups—the mindfulness group (n = 30), the yoga group (n = 30), or the control group (n = 30)—using a computer number random generator...randomization occurred within the feasible time frame of their schedule...stratified randomization was used to ensure that male students were in all three groups"*  Comment: Computer generated randomization process. |
| **Allocation concealment**(selection bias) | | High | | Comment: It was not specified who was conducting the randomization. |
| **Blinding of participants and personnel** (performance bias) | | High | | Comment: There was no comment in article about blinding of outcome assessment. It was assumed participants were not blinded and risk of performance bias is high. |
| **Blinding of outcome assessment** (detection bias) | | High | | Comment: Survey was a self-administered questionnaire. As this study uses self-report outcomes and no blinding, there is a risk of detection/participant ascertainment bias and recall bias. |
| **Incomplete outcome data** (attrition bias) | | High | | Quote*: "During the course of the study, 17 (20.24%) students left the study for various reasons...The entire data package of any student who did not complete all 4 data collection sessions was excluded from consideration for data analyses."*  Comment: Since there was over 20% attrition and reasons for attrition specific to allocated group were not provided, this study was considered high risk of attrition bias. |
| **Selective reporting** (reporting bias) | | Low | | Comment: The study protocol is not available online (i.e. not cited in the study, registered on ClinicalTrials.gov or the WHO portal, and not found through a Google Search), although there were no inconsistencies within the paper to suggest measures reported were different than those intended to be reported at the beginning of the study. |
| **Other bias** (non-compliance) | | Low | | Non-compliance: *"To ensure that participants keep track of their home practice, they were asked to complete a short form on their home practice at each session…* *The average time of practice for the mindfulness group was 6.1 times per week for a total of 141.7 minutes per week."* There were measures in place to ensure that participants were complied with home practice, but otherwise, no reason to suspect concern. |
| Author, Year | | Gallego, 2014 (Spain) | | |
| Methods | | Randomized Controlled Trial | | |
| Participants | | 125 university students in Bachelor of Education Program (mean age = 20.07; 57.6% females) | | |
| Interventions | | MBCT-based Mindfulness  The intervention consisted of 8 one-hour weekly sessions with MBCT components (i.e. body-scan, mindful breathing, sitting meditation), led by a therapist. Home practice consisted of listening to the body-scan and sitting meditation mp3 recordings. This home practice was highly recommended but not required to continue participating in the workshop. | | |
| Comparator | | 1. Physical Education   8 weekly 1-hr sessions of PE classes, consisting of 15 min stretching/breathing, 30-minute sport games, 15 mins stretching/breathing. Led by a specialist.   1. No Intervention Control Group | | |
| Outcomes of interest | | Post-Intervention   - Depression: measured with the DASS - Anxiety: measured with the DASS - Stress: Measured with the DASS | | |
| Author’s Conclusions | | - Scores for depression, anxiety, and stress in the mindfulness group all decreased significantly post-test, compared to the other two groups (PE and control). The DASS total score showed significant differences between groups. The mindfulness group average reduced the most, followed by the PE group, then control. There was no statistically significant difference between PE and control for the stress variable. | | |
| Notes | | Post assessment sample size was not available for the no intervention control group within the article. We contacted author twice and did not hear back. This study was included in the MBI versus Active control meta-analysis but reported narratively for MBI versus passive control due to these limitations. | | |
| Risk of Bias | | | | |
| **Random Sequence Generation** (selection bias) | | Low | | Quote: "*The students were randomly assigned to either the mindfulness group, the PE intervention group or the control group."*  Comment: The investigators reported a random sequence and therefore was judged as low risk of bias. |
| **Allocation concealment**(selection bias) | | High | | Comment: It was not specified who was conducting the randomization. |
| **Blinding of participants and personnel** (performance bias) | | High | | Comment: Due to the nature of the intervention, very difficult to blind participants. Risk of performance bias is high. No comment about blinding in paper. Blinding is difficult due to nature of the intervention. However, there was an active comparison (PE), and whether or not participants were told which was the control /intervention is unknown. |
| **Blinding of outcome assessment** (detection bias) | | High | | Comment: No comment in article about blinding of outcome assessment. Since outcomes are self-report and participants were not blinded to group assignment, there is a risk of detection/participant ascertainment bias and recall bias. |
| **Incomplete outcome data** (attrition bias) | | High | | Comment: Final sample sizes not available for all groups in the article. Author contacted for final sample size but did not hear back. It is apparent that data is not complete for at least two of the three groups as final sample size for PE was 28/42 and MBCT was 30/41. Since over 20% attrition from intervention and active control, no discussion of reasons for loss to follow-up, and no attrition rates for passive control, this study was considered high risk of attrition bias. |
| **Selective reporting** (reporting bias) | | Low | | Comment: The study protocol is not available online (i.e. not cited in the study, registered on ClinicalTrials.gov or the WHO portal, and not found through a Google Search), although there were no inconsistencies within the paper to suggest measures reported were different than those intended to be reported at the beginning of the study. |
| **Other bias** (non-compliance) | | Low | | Comment: Participants were excluded if did not attend over 80% of sessions, and therefore, would have been captured in attrition bias. The authors did not mention loss to follow up nor issues with compliance. |
| Author, Year | Grandpierre, 2013 (CA) (unpublished dissertation) | | | |
| Methods | Randomized Controlled Trial | | | |
| Participants | 42 post-secondary students without depression or other mental illness (mean age=25.1; 70% females). | | | |
| Interventions | Mindfulness for Academic Success (MAS) program  The intervention lasted for 6 weeks with 1.5 hour guided group sessions every week. Participants were taught a variety of formal and informal mindfulness practices, with three-minute practices before each class. Asked to complete homework between each class six days per week for approximately 15 minutes (including 3 minute breathing space and a daily mindfulness task related to the weeks’ session). | | | |
| Comparator | Wait-list control | | | |
| Outcomes of interest | Post-intervention:   - Depressive Symptoms: DASS depression subscale - Anxiety Symptoms: DASS anxiety subscale - Stress: DASS stress subscale - Emotion regulation: Barkley Deficit in Executive Functioning Scale- Long Form self-regulation of emotions subscale. | | | |
| Author’s Conclusions | - The mindfulness group had significantly lower scores on the self-regulation of emotions than control (positive effect). - No significant effect of the intervention on stress, depressive or symptoms in comparison to control in the ITT sample. | | | |
| Notes |  | | | |
| Risk of Bias | | | | |
| **Random Sequence Generation** (selection bias) | Low | | Quote: "*Participants were randomized to either the MAS program or the WL control condition… The researcher randomly selected each block and students were assigned according to the block’s condition sequence "*  Comment: Although the random component of assignment was not described in detail, the authors did indicate random assignment via random selection of a block sequence and there is no reason to believe they did not conduct randomization. | |
| **Allocation concealment**(selection bias) | High | | Quote: *"Allocations were generated using blocks of 4 to prevent selection bias and to maintain close balance of the numbers of participants in each treatment group at any time during the trial. The block sequences were: 1) MAS, WL, MAS, WL; 2) WL, MAS, WL, MAS; 3) MAS, MAS, WL, WL; 4) WL, WL, MAS, MAS; 5) MAS, WL, WL, MAS; 6) WL, MAS, MAS, WL. The researcher randomly selected each block and students were assigned according to the block’s condition sequence."*  Comment: Although blocked randomization was performed, the blocks were small, and the researcher would have the ability to foresee assignment. No indication that concealment was used during allocation. | |
| **Blinding of participants and personnel** (performance bias) | High | | Comment: There was no comment in the article about blinding. Blinding is difficult due to nature of the intervention. Therefore, since the comparison was wait-list control (not a sham intervention), and there was no comment about blinding, it was assumed participants were not blinded and risk of performance bias is high. | |
| **Blinding of outcome** assessment (detection bias) | High | | Comment: There was no comment in article about blinding of outcome assessment. Since outcomes are self-report and participants were not blinded to group assignment, there is a risk of detection/participant ascertainment bias and recall bias. | |
| **Incomplete outcome data** (attrition bias) | High | | Quote: *"Attrition in the MAS program was 55%, and in the WL condition it was 20%, making the differential attrition rate statistically significant. Accordingly, attrition was considerably greater than the 30% rate established for this trial and significantly higher in the MAS program than in the WL condition."*  Comment: Since attrition was greater than 20% and there was a significant difference in attrition rates across groups, the study was deemed to have a high risk of attrition bias. | |
| **Selective reporting** (reporting bias) | Low | | Comment: The study protocol is not available online (i.e. not cited in the study, registered on ClinicalTrials.gov or the WHO portal, and not found through a Google Search), although there were no inconsistencies within the paper to suggest measures reported were different than those intended to be reported at the beginning of the study. | |
| **Other bias**(non-compliance) | High | | Non-compliance: *"Homework compliance (at least 70%), program attendance (at least 5 sessions…No participant complied with all three requirements...In the MAS completer sample (n = 9), participants attended 87% of sessions, with a mean of 5.22 (SD = 0.83) sessions... Overall participants completed 32% of all homework, 38% less than the minimum (70%) feasibility requirement...Participants who attended two or less sessions were considered to be dropouts (n=11)…[there was] poor homework compliance."* Since no participant complied with “compliance” requirements, even in the completer sample, non-compliance bias was considered high. | |
| Author, Year | Greer, 2016 (US) (published and unpublished dissertation) | | | |
| Methods | Randomized Controlled Trial | | | |
| Participants | 365 university students enrolled in a psychology course (ages=18-21; 75% female) | | | |
| Interventions | Mindfulness Intervention  The intervention was delivered over the Internet, using university's Moodle course management system. The intervention lasted 4 weeks and included 6 guided mindfulness sessions followed by a mindfulness log (1 in weeks 1 and 2, 2 sessions/logs in weeks 3 and 4). No daily practice requirement. | | | |
| Comparator | Stress Management Comparison Group  This group was sent links to different psychoeducational sheets to read covering ways to manage stress. Participants were required to spend at least 5 minutes per week reviewing stress management tips. | | | |
| Outcomes of interest | Post-intervention & 1 month post intervention   - Depressive symptoms: measured with the DASS depression subscale - Anxiety: measured with the DASS anxiety subscale - Stress: measured with the Perceived Stress Scale | | | |
| Author’s Conclusions | - All groups had significant reductions in depression. Anxiety, and stress, although there were not significant between group effects. | | | |
| Notes | Same as Nguyen (in press) article  There was a second intervention not discussed in our review (not full mindfulness). | | | |
| Risk of Bias | | | | |
| **Random Sequence Generation** (selection bias) | Low | | Quote: *"The students were then randomized using Excel's random number generator"*  Comment: The investigators describe a random component in the sequence generation process (excel generated). | |
| **Allocation concealment** (selection bias) | Low | | From personal communication: *"A lab research assistant conducted the randomization."*  Comment: Although not explicitly described, personal communication with the author suggests that someone other than the primary investigator conducted the randomization, limiting the risk of selection bias. | |
| **Blinding of participants and personnel** (performance bias) | Low | | Personal communication: "*The participants were not explicitly told which intervention condition they were randomized into"*  Comment: The investigators took measures to minimize the risk of performance bias by not revealing which intervention was the control or their group assignment. | |
| **Blinding of outcome** assessment (detection bias) | Low | | Comment: No comment in article. However, since outcomes are self-report and participants were blinded to group assignment, the risk of detection/participant ascertainment bias is minimized or mitigated. | |
| **Incomplete outcome data** (attrition bias) | High | | From Figure 1: At posttest, 110 participants (30%) had dropped out of the study. 41(33.6%) dropped out of the mindfulness group and 24 (19.7%) from the comparison groups.  Comment: Restricted maximum likelihood estimation was appropriately used to account for the missing data in the analysis, but since this meta-analysis is using post-score means and SDs, missing is not accounted for in these statistics. Since attrition was greater than 20% and different between groups this could introduce attrition bias. | |
| **Selective reporting** (reporting bias) | Low | | Comment: The study protocol was not available online (i.e. not cited in the study, registered on ClinicalTrials.gov or the WHO portal, and not found through a Google Search) but it appears that the published thesis and journal article included all expected outcomes. | |
| **Other bias**(non-compliance) | Low | | Non-compliance: No comment about compliance in the dissertation and therefore no reason to suspect concern. | |
| Author, Year | Greeson, 2014 (US) (published) | | | |
| Methods | Randomized Controlled Trial | | | |
| Participants | 90 undergraduate, graduate, and professional students (mean age=25.4; 66% females). | | | |
| Interventions | Koru a brief mindfulness based intervention (adapted from MBSR)  The intervention was 4 weeks with 1.5 hour guided group sessions per week. 10 minutes of home practice per and reading required chapters from *Wherever You go, There You are (Kabat-Zinn, 1995)* was required between sessions. | | | |
| Comparator | Wait-list Control | | | |
| Outcomes of interest | Post intervention   - Stress: Perceived Stress Scale - Sleep: measured with the Medical Outcome Study Sleep Scale (MOS SLP9) Sleep Problems Index 2 | | | |
| Author’s Conclusions | - Perceived stress was significantly lower in the Koru group compared to the control post-intervention. - Sleep quality was significantly improved in the Koru group compared to the control. | | | |
| Notes | Narrative for sleep. | | | |
| Risk of Bias | | | | |
| **Random Sequence Generation** (selection bias) | Low | | Quote: *“Blocked randomization (block size = 2) was used to ensure balanced study groups after every two students enrolled. The randomization schedule was created using Research Randomizer (*[*www.randomizer.org*](http://www.randomizer.org)*).”*  Comment: The authors described the randomization component as being done using a computer random number generator. | |
| **Allocation concealment**(selection bias) | High | | Quote: *“The randomization schedule was created using Research Randomizer (www.randomizer.org), and was performed by the study coordinator…Following randomization, the study coordinator contacted students to inform them of their group assignment.”*  Comment: Participants or investigators enrolling participants could possibly foresee assignments and thus introduce selection bias, such as allocation based on using an open random allocation schedule (e.g. a list of random numbers) and blocks are small (i.e. 2). Additionally, the study coordinator was the one conducting the randomization and contacting participants to tell them their assignment. Due to the unconcealed procedure, bias could have been introduced into the study at this point. | |
| **Blinding of participants and personnel** (performance bias) | High | | Comment: There was no comment in the article about blinding. Blinding is difficult due to nature of the intervention. Therefore, since the comparison was wait-list control (not a sham intervention), and there was no comment about blinding, it was assumed participants were not blinded and risk of performance bias is high. | |
| **Blinding of outcome** assessment (detection bias) | High | | Comment: There was no comment in article about blinding of outcome assessment. Since outcomes are self-report and participants were not blinded to group assignment, there is a risk of detection/participant ascertainment bias and recall bias. | |
| **Incomplete outcome data** (attrition bias) | Low | | Comment: Intention to treat analysis appears to be performed since figure 1 identifies that all participants were analyzed. The flow chart indicates no loss to follow up in the Koru group, and although 6 participants discontinued due to scheduling conflicts, there is no indication in the text or flowchart that any post-intervention data was missing for the Koru group. In text on page 7, they said that “Of the 45 students who participated in Koru after being randomized to the Wait-list group...” which suggests that they did not lose any of the 45 control participants during the control phase. | |
| **Selective reporting** (reporting bias) | Low | | Quote: “*The study protocol was conducted between Fall 2012 and Spring 2013. Full approval by the university’s Institutional Review Board was obtained prior to data collection.”*  Comment: Although the study mentioned a protocol, the study protocol is not available online(i.e. not cited in the study, registered on ClinicalTrials.gov or the WHO portal, and not found through a Google Search), although there were no inconsistencies within the paper to suggest measures reported were different than those intended to be reported at the beginning of the study. | |
| **Other bias**(non-compliance) | Low | | Non-compliance: The study states that attendance of at least 3 classes was required to be operationalized as “completed,” and only 71% of students “completed” the Koru intervention. Since noncompliance did not exceed 30% (i.e. compliance levels were acceptable), this is judged as low risk of bias. | |
| Author, Year | | Hazlett-Stevens, 2016 (US) | | |
| Methods | | Randomized Controlled Trial | | |
| Participants | | 92 undergraduate and graduate students. Excluded if they were currently receiving psychotherapy (mean age=22.1; 75% females) | | |
| Interventions | | Mindfulness-Based Stress Reduction Bibliotherapy  The intervention lasted 10 weeks. Participants were asked to res one chapter in "A Mindfulness-Based Stress Reduction Workbook" (Stahl and Goldstein) per week. Participants were also asked to engage in reflection exercises and mindfulness practices outlined in the chapter for that week, using the workbook's mp3 recordings and weekly content quizzes. No daily practice requirements. | | |
| Comparator | | No Intervention Control | | |
| Outcomes of interest | | Post-intervention:   - Depressive Symptoms: measured with the DASS depression subscale - Anxiety: measured with the DASS anxiety subscale - Stress: measured with the Perceived Stress Scale | | |
| Author’s Conclusions | | Bibliotherapy intervention participants reported increased mindfulness compared to the control condition and significantly greater decreases in depression, anxiety, stress, (DASS) perceived stress (PSS), and anxiety sensitivity (ASI). Compared to control, bibliotherapy participants also reported improvements in physical health, psychological, and environmental, quality of life domains. | | |
| Notes | |  | | |
| Risk of Bias | | | | |
| **Random Sequence Generation** (selection bias) | | Low | | Quote: *"Randomization was performed using the random numbers generated by the website*  *http://www.randomizer.org/.*" |
| **Allocation concealment** (selection bias) | | High | | Comment: It was not specified who was conducting the randomization. |
| **Blinding of participants and personnel** (performance bias) | | High | | Quote*: "Participants were not informed of their randomized condition until they had signed the informed consent form and completed baseline assessment measures"*  Comment: However, blinding is difficult due to nature of the intervention. There was no comment in the article about blinding, nor was there a sham-intrevention. It was thus assumed that participants were not blinded and risk of performance bias is high. |
| **Blinding of outcome assessment** (detection bias) | | High | | Comment: As this study uses self-report outcomes and no blinding, there is a risk of detection/participant ascertainment bias and recall bias. |
| **Incomplete outcome data** (attrition bias) | | High | | Quote: *“Outcome data were only available for 53% of bibliotherapy intervention participants... less motivated individuals in the bibliotherapy group might not be represented in the outcome analyses"* In comparison, 96% of the control participants completed outcome measures at the end. The high attrition rate puts this study at high risk of attrition bias due to attrition>20% and differential attrition between groups. |
| **Selective reporting** (reporting bias) | | Low | | Comment: The study protocol is not available online (i.e. not cited in the study, registered on ClinicalTrials.gov or the WHO portal, and not found through a Google Search), although there were no inconsistencies within the published paper or dissertation to suggest measures reported were different than those intended to be reported at the beginning of the study. |
| **Other bias** (non-compliance) | | Low | | Non-compliance: No comment about compliance and therefore no reason to suspect concern. |
| Author, Year | Jimenez, 2009 (unpublished dissertation) (US) | | | |
| Methods | Randomized Controlled Trial | | | |
| Participants | 120 psychology students with moderate depressive symptoms but not currently being treated (mea age=19.81; 61% females). | | | |
| Interventions | Mindfulness CD  The intervention lasted 4 weeks. Participants were provided with a 20-minute CD with guided mindfulness meditation. Participants were instructed to listen to the CD three times a week for the 4 weeks. No daily practice requirements. | | | |
| Comparator | Relaxation CD  The relaxation group was structured the same as the mindfulness group but the CD had guided instruction for alternative relaxation strategies (not including mindfulness). | | | |
| Outcomes of interest | Post-intervention, 8 weeks, 20 weeks post:   - Depressive Symptoms: Measured with the Center for Epidemiologic Studies-Depression | | | |
| Author’s Conclusions | Both the relaxation and the mindfulness group showed significant reductions in depressive symptoms at post-intervention and 24 week follow-up, with mindfulness having a larger effect size than relaxation (although did not reach significance). | | | |
| Notes |  | | | |
| Risk of Bias | | | | |
| **Random Sequence Generation** (selection bias) | Low | | Quote: *"Participants who elected to participate in the study were randomly assigned to one of the two conditions."*  Comment: Although the random component of assignment was not described in detail, the authors did indicate random assignment was done and there is no reason to believe they did not conduct randomization. | |
| **Allocation concealment**(selection bias) | High | | Comment: No comment about who conducted the randomization and if the randomization sequence was open. | |
| **Blinding of participants and personnel** (performance bias) | High | | Comment: There was no comment in the article about blinding. Blinding is difficult due to nature of the intervention; blinding is only possible in a behavioural intervention if a sham intervention is provided where participants are unable to determine if they are in the treatment or comparison group. Despite the fact that there were two interventions, there was no comment about blinding, and therefore it was assumed participants were not blinded and risk of performance bias is high. | |
| **Blinding of outcome** assessment (detection bias) | High | | Comment: There was no comment in article about blinding of outcome assessment. Since outcomes are self-report and participants were not blinded to group assignment, there is a risk of detection/participant ascertainment bias and recall bias. | |
| **Incomplete outcome data** (attrition bias) | Low | | Quote: *"During the post-intervention period at 5 weeks, the overall attrition rate in the sample was 2.5% (n = 117). There were no statistically significant group, gender, age, or ethnic differences in attrition or depression cut-off criteria."*  Comment: Since attrition was low for the full sample there would be a low risk of attrition bias. | |
| **Selective reporting** (reporting bias) | Low | | Comment: The study protocol is not available online (i.e. not cited in the study, registered on ClinicalTrials.gov or the WHO portal, and not found through a Google Search), although there were no inconsistencies within the paper to suggest measures reported were different than those intended to be reported at the beginning of the study. | |
| **Other bias**(non-compliance) | Low | | Non-compliance:*" Participants who did not complete the four- week intervention period,...were also excluded from analysis."* Since participants who did not comply with the treatment program were excluded from analysis, this mitigates any non-compliance bias but adds to attrition bias (previously assessed). | |
| Author, Year | | Kang, 2008 (Korea) | | |
| Methods | | Randomized Controlled Trial | | |
| Participants | | 41 undergraduate nursing students, excluding those with a history of a mental illness (mean age=~22; 100% females). | | |
| Interventions | | Meditation-based stress management  The intervention consisted of 8 weeks of 1.5-2h weekly sessions, conducted by researcher knowledgeable in mindfulness meditation. Weekly content included stretching, body scans, breathing meditation, and walking meditation, with subsequent self-reflection on recognizing one's good points, sense of gratitude, and mortality. No daily practice requirements. | | |
| Comparator | | No Intervention Control | | |
| Outcomes of interest | | Post Intervention:   - Depressive Symptoms: measured with the Beck Depression Inventory - Anxiety: Measured with the State Anxiety Inventory - Stress: Measured with the psycho- social wellbeing index-short form (PWI-SF) questionnaire where higher scores reflect greater stress. | | |
| Author’s Conclusions | | Results show that a stress coping program based on mindfulness meditation showed a significant decrease in stress and anxiety scores relative to the control group. There was no significant difference in depression scores. | | |
| Notes | |  | | |
| Risk of Bias | | | | |
| **Random Sequence Generation** (selection bias) | | Low | | Quote: "*21 students were randomly assigned to the experimental group, and 20 were assigned to the control group. For the randomization procedure, each participant drew a number … only known to that individual…Odd numbers were assigned to experimental, even numbers to the control group."*  Comment: The investigators reported a random sequence (drawing lots) and therefore was judged as low risk of bias. |
| **Allocation concealment**(selection bias) | | Low | | Quote: "*For the randomization procedure, each participant drew a number … only known to that individual…Odd numbers were assigned to experimental, even numbers to the control group."*  Comment: There were measures put in place to ensure that the study investigator would not know of assignments in advance. |
| **Blinding of participants and personnel** (performance bias) | | High | | Comment: There was no comment in the article about blinding, nor was there a sham-intervention. It was thus assumed that participants were not blinded and risk of performance bias is high. |
| **Blinding of outcome assessment** (detection bias) | | High | | Comment: The survey was a self-administered questionnaire. As this study uses self-report outcomes and no blinding, there is a risk of detection/participant ascertainment bias and recall bias. |
| **Incomplete outcome data** (attrition bias) | | High | | Comment: Five participants were eliminated from the experimental group and four from the control group because they missed the program more than twice and insufficiently answered the survey questionnaire during the study period. Reasons for not attending or not completing the survey were not provided. >20% attrition in these groups could introduce attrition bias. |
| **Selective reporting** (reporting bias) | | Low | | Comment: The study protocol is not available online (i.e. not cited in the study, registered on ClinicalTrials.gov or the WHO portal, and not found through a Google Search), although there were no inconsistencies within the published paper or dissertation to suggest measures reported were different than those intended to be reported at the beginning of the study. |
| **Other bias** (non-compliance) | | Low | | Non-compliance: No comment about compliance/definition for compliance. No reason to suspect concern. |
| Author, Year | | Kaviani, 2011 (same as Kaviani 2008) (published and unpublished) (Iran) | | |
| Methods | | Randomized Controlled Trial | | |
| Participants | | 45 2nd and 3rd year undergraduate students, excluding psychology students (mean age=20.5 intervention group, 20.7 control group; 100% females) | | |
| Interventions | | MBCT  The intervention lasted 8 weeks and consisted of weekly 2.5 hours in duration. The intervention was delivered in person and is a group-based design lead by a psychologist. Included CBT skills and Mindfulness practices. Home practice and assignments were provided including 40 minutes of mindfulness practice per day. | | |
| Comparator | | Wait List Control | | |
| Outcomes of interest | | Post intervention, 1 month, 6 months:   - Depression: Measured with the BDI - Anxiety: Measured with the BAI | | |
| Author’s Conclusions | | The authors conclude that they were *"encouraged that the intervention improved quality of well-being*." however many limitations such as single gender, lack of intervention comparison were also noted. | | |
| Notes | | Anxiety and depression scores only presented in graphical format and in regression models. Obtained means and standard deviations for outcomes via personal communication. | | |
| Risk of Bias | | | | |
| **Random Sequence Generation** (selection bias) | | Low | | Quote: *"Randomization of the participants was by a statistician, who was blind to research procedure."*  Comment: The investigators reported a random sequence generation and therefore was judged as low risk of bias |
| **Allocation concealment** (selection bias) | | Low | | Quote: *"Randomization of the participants was by a statistician, who was blind to research procedure."*  Comment: The investigators identified a third party who conducted the randomization limiting the risk of selection bias. |
| **Blinding of participants and personnel** (performance bias) | | High | | Comment: Due to the waitlist nature of the intervention it is unlikely that participants were blinded. There was not mention of patient blinding in the procedure. |
| **Blinding of outcome assessment** (detection bias) | | High | | Comment: Survey was a self-administered questionnaire. As this study uses self-report outcomes and no blinding, there is a risk of detection/participant ascertainment bias and recall bias. |
| **Incomplete outcome data** (attrition bias) | | High | | Comment: 9/45 total participants were not included in the final analysis due to failure to complete all assessments; 3/20 (15%) in the intervention group and 6/25 (24%) in the control group. Attrition was 20% in total and reasons for failure to complete assessments were not provided, therefore this study was judged as high risk of attrition bias. |
| **Selective reporting** (reporting bias) | | Low | | Comment: The study protocol is not available online (i.e. not cited in the study, registered on ClinicalTrials.gov or the WHO portal, and not found through a Google Search), although there were no inconsistencies within the paper to suggest measures reported were different than those intended to be reported at the beginning of the study. |
| **Other bias** (non-compliance) | | Low | | Comment: Homework was a component of the intervention, however no concerns were raised by the authors of this affecting the results of the study. |
| Author, Year | | Kaviani, 2012 (published and unpublished ) (Iran) | | |
| Methods | | Randomized Controlled Trial | | |
| Participants | | 139 students living in dormitories that scored high on the BDI (greater than 15) (mean age=21.4; 100% females). | | |
| Interventions | | Group based mindfulness cognitive therapy  The intervention was 8 weeks in duration. The intervention was delivered in person during 2.5 hr sessions every week lead by a psychologist who was trained in MBCT program. Guided mindfulness practice was also expected including 40 minutes of mindfulness practice per day. | | |
| Comparator | | Wait List Control | | |
| Outcomes of interest | | Post intervention, 1 month, and 6 months   - Depression: measured with the Beck Depression Inventory - Anxiety: measured with the Beck Anxiety Inventory | | |
| Author’s Conclusions | | The results of this study provide encouraging empirical evidence for the effectiveness of MBCT in a new cultural setting, and extend our knowledge about the effectiveness and generalizability of the MBCT in real-life stressful situations. | | |
| Notes | | Anxiety and depression scores only presented in graphical format and in regression models. Obtained means and standard deviations for outcomes via personal communication. | | |
| Risk of Bias | | | | |
| **Random Sequence Generation** (selection bias) | | Low | | Quote: “individuals were randomly allocated either  to receive MBCT or to remain in waiting list.”  Comment: The investigators reported a random component and therefore was judged as low risk of bias |
| **Allocation concealment**(selection bias) | | Low | | Quote: “Of 150 female students randomly selected by a statistician, who was blind to research interventions and groups, from a list of female students living in university dormitories”  Comment: Study indicated statistician performing randomization was blinded. |
| **Blinding of participants and personnel** (performance bias) | | High | | Comment: There was not mention of blinding in the article, due to the waitlist nature of the study, it is likely that participants were not blinded. |
| **Blinding of outcome assessment** (detection bias) | | High | | Comment: The survey was a self-administered questionnaire. As this study uses self-report outcomes and no blinding, there is a risk of detection/participant ascertainment bias and recall bias. |
| **Incomplete outcome data** (attrition bias) | | Low | | Comment: Only one person in the entire study population did not complete all assessments. |
| **Selective reporting** (reporting bias) | | Low | | Comment: The study protocol is not available online (i.e. not cited in the study, registered on ClinicalTrials.gov or the WHO portal, and not found through a Google Search), although there were no inconsistencies within the paper to suggest measures reported were different than those intended to be reported at the beginning of the study. |
| **Other bias** (non-compliance) | | Low | | Comment: Although homework was provided, there was no evaluation of weekly homework compliance and no indication of noncompliance to the intervention. |
| Author, Year | Kuhlmann, 2016 (Germany) (published) | | | |
| Methods | Randomized Controlled Trial | | | |
| Participants | 182 medical and dental students (mean age=23.39; 84% females). | | | |
| Interventions | MediMind (Mindfulness based stress reduction program for medical students)  The intervention lasted 5 weeks and involved weekly 1.5 hour guided group sessions. CD’s were provided for home practice but daily practice was not indicated as a requirement. | | | |
| Comparator | 1. Autogenic Training   Structure the same as MediMind but the content of the sessions and take home CD’s were focused on autogenic training (a relaxation technique), not mindfulness meditation.   1. Wait-List control | | | |
| Outcomes of interest | Post-Intervention and 1 year follow-up:   - Stress: measured with the Tiers Inventory for the Assessment of Chronic Stress (TICS) | | | |
| Author’s Conclusions | - Chronic stress was not significantly different between groups over time. - There was a significant difference between the Medimind group and control group on psychological morbidity, although post-hoc tests were unable to further interpret the results. However, descriptive analysis revealed that the MediMind group experienced a reduction of psychological distress one year after training, whereas, autogenic training and control seemed to have deteriorating psychological morbidity (although not significant). | | | |
| Notes | They had reported the Brief State Inventory cumulative score. We attempted to contact trialists but we were unable to obtain depression and anxiety subscale scores for inclusion in the respective meta-analyses. | | | |
| Risk of Bias | | | | |
| **Random Sequence Generation** (selection bias) | Low | | Quote: *"Participants were randomized to one of the three study groups. In order to control for potential confounding effects, students were stratified randomized by course of study, semester, and sex…allocation ratio with 2(Medimind): 2(Autogenic Training): 1 Control. Randomization was operationalized via drawing lots."*  Comment: The investigators describe a random component in the sequence generation process (drawing lots). | |
| **Allocation concealment** (selection bias) | Low | | Quote: *"…drawing lots by an independent member of the institute not involved in the project"*  Comment: The investigators identified a third party who conducted the randomization limiting the risk of selection bias. | |
| **Blinding of participants and personnel** (performance bias) | High | | Comment: There was no comment in the article about blinding. Blinding is difficult due to nature of the intervention; blinding is only possible in a behavioural intervention if a sham intervention is provided where participants are unable to determine if they are in the treatment or comparison group. Therefore, since one of the comparisons was wait-list control (not a sham intervention), and there was no comment about blinding, it was assumed participants were not blinded and risk of performance bias is high. | |
| **Blinding of outcome** assessment (detection bias) | High | | Comment: There was no comment in article about blinding of outcome assessment. Since outcomes are self-report and participants were not blinded to group assignment, there is a risk of detection/participant ascertainment bias and recall bias. | |
| **Incomplete outcome data** (attrition bias) | High | | Quote: *“183 completed baseline assessment and of this sample 61% (n=112) returned post-measures…Due to an error in the online version of the baseline assessment, 13 participants had to be excluded from evaluation (MM: n=6, AT:n=6, CG: n=1)…Students who had dropped out had significantly higher psychological morbidity at baseline*."  From Figure 1: “*At post-intervention follow up, 53% in the MediMind group completed post-assessment measure, 57% of the autogenic training group completed post-assessment measures, and 51% of the control group completed post assessment measures. At the1 year follow-up, 47% in MediMind, 44% in autogenic training, and 40% of the control group completed assessments.”*  Comment: Since attrition was over 20% and there were significant differences between those who followed up and those who did not on outcomes of interest at baseline, attrition most likely impacted final results. Therefore, this study poses a high risk of attrition bias. | |
| **Selective reporting** (reporting bias) | Low | | Comment: Protocol was available online. It appears that the published reports included all expected outcomes, including those that were pre-specified. This being said, the study reported an overall psychological morbidity as opposed to the individual subscales on the BSI (including anxiety and depression), which is required for this systematic review. The author of this review has contacted the trialists. | |
| **Other bias**(non-compliance) | Low | | Non-compliance: No significant differences between intervention groups for number of training units participants took part in. There was no definition of compliance so unable to determine if non-compliance bias is present**.** | |
| Author, Year | | Kvillemo, 2016 (Sweden) | | |
| Methods | | Randomized Controlled Trial | | |
| Participants | | 90 university students (mean age for completers 29, non completers 24; 75% females) | | |
| Interventions | | Internet-based mindfulness program  Participants were given access to an online platform which featured 8 weekly modules about theoretical foundations of mindfulness, including relaxation, meditation, body-mind connection. The program also included formal and informal exercises following MBSR standards of practice. Formal exercises were facilitated by 15-30min audio files. Home practice of 30-45 mins a day, 6-7 days per week was encouraged. | | |
| Comparator | | Internet-based expressive writing program  4 week program; participants were writing about stressor-related emotions and thoughts for 20 minutes of 4 occcasions. Participants were also asked to write for 10 minutes using a positive prompts (e.g. what makes you feel hopeful about the future) | | |
| Outcomes of interest | | Post intervention:   - Depressive Symptoms: Measured with the CES-D | | |
| Author’s Conclusions | | There was no statistically significant change over time for depression symptoms. | | |
| Notes | |  | | |
| Risk of Bias | | | | |
| **Random Sequence Generation** (selection bias) | | Low | | Quote: *“Participants were randomized to either the*  *intervention group (Internet-based mindfulness training program) or an active control group (Internet-based expressive writing program) on a rolling basis using a random sequence of numbers."*  Comment: computerized randomization process. |
| **Allocation concealment** (selection bias) | | Low | | Quote: "*One of the authors generated the sequence of numbers using SPSS statistical analysis software (IBM Corp) and another author enrolled and assigned participants in the order they were recruited."*  Comment:The division of roles prevented study investigators from knowing the assignments in advance and minimize selection bias. |
| **Blinding of participants and personnel** (performance bias) | | High | | Comment: While there was an active control, there was no comment in the article about blinding. It was assumed participants were not blinded and risk of performance bias is high. |
| **Blinding of outcome assessment** (detection bias) | | High | | Comment: The survey was a self-administered questionnaire. As this study uses self-report outcomes and no blinding, there is a risk of detection/participant ascertainment bias and recall bias. |
| **Incomplete outcome data** (attrition bias) | | High | | Comment: Of those randomized to the mindfulness training program (n=46), 40 individuals (30 women and 10 men) began the program and 39% (18/40, 16 women and 2 men) completed it. Very few participants completed the program, far exceeding 20%, and therefore judged as high risk of attrition bias. |
| **Selective reporting** (reporting bias) | | Low | | Comment: Listed on clinicalTrials.gov NCT02062762. The published reports (both the unpublished dissertation and published article) included all expected outcomes. |
| **Other bias** (non-compliance) | | Low | | Comment: Authors stated they contacted participants if compliance was less than 14 days of access. On average, participants practiced 3.6 days per week, which although would not meet daily practice requirements, exceeded the minimum of 14 days in total over 8 weeks. Compliance was not formally defined and no comment was made about noncompliance. |
| Author, Year | Legget 2010 (US) (published) | | | |
| Methods | Cluster-Randomized Controlled Trial | | | |
| Participants | 90 first year nursing students (mean age=not reported; 87% females) | | | |
| Interventions | Brief Mindfulness Breathing Intervention  The intervention is 5 weeks in duration.   - Week 1-3 (in person, group: For 3 weeks, participants had 1.5 hour group sessions during clinical practice laboratory times. These sessions were taught by the primary investigator and included a guided breathing mindfulness followed by debriefing of the experience. - Home Practice: Participants were provided with CDs for home practice and were asked to continue daily practice (10-15minutes per day) at home. Records of daily practice were returned in week 5. | | | |
| Comparator | No-intervention Control  Attended class as usual. | | | |
| Outcomes of interest | Post-intervention, 2 months, and 4 months:   - Depressive Symptoms: measured using the CES-D | | | |
| Author’s Conclusions | - The intervention groups had lower depressive symptoms than the control groups (after accounting for within group similarities) at post-test, 2 month follow-up and 4 month follow-up. However, the difference between groups only reached significance by the 4month follow-up. | | | |
| Notes | No ICC reported. | | | |
| Risk of Bias | | | | |
| **Random Sequence Generation** (selection bias) | Low | | Quote: *"The 12 classes were randomly assigned to the treatment intervention or treatment as usual group using a number chart of generated random numbers"*  Comment: The investigators reported a random sequence generation (random number chart) and therefore was judged as low risk of bias. | |
| **Allocation concealment** (selection bias) | Low | | Quote: “*The 12 classes were randomized into groups by assigning each class a number and then using a number chart of computer generated random numbers."*  Comment: Although they do not comment on who conducted the randomization and who assigned each class a number, given randomization was at the classroom level (so difficult to know what participants are in the class) and effort was made to de-identify classrooms, this was judged as low risk of bias.”  Comment on Baseline Differences: There appear to be no significant differences between groups at baseline. Although the authors did indicate that participants within groups were more similar than between (but ICC was not reported).  Comment on recruitment bias:It does not appear that individuals were recruited to the trials after classrooms were randomized. | |
| **Blinding of participants and personnel** (performance bias) | High | | Comment: There was no comment in the article about blinding. Blinding is difficult due to nature of the intervention; blinding is only possible in a behavioural intervention if a sham intervention is provided where participants are unable to determine if they are in the treatment or comparison group. Therefore, since the comparison was a no-intervention control (not a sham intervention), and there was no comment about blinding, it was assumed participants were not blinded and risk of performance bias is high. | |
| **Blinding of outcome** assessment (detection bias) | High | | Comment: There was no comment in article about blinding of outcome assessment. Since outcomes are self-report and participants were not blinded to group assignment, there is a risk of detection/participant ascertainment bias and recall bias. | |
| **Incomplete outcome data** (attrition bias) | Low | | Quote: *"5 participants were unable to complete the exercises and requested to withdraw from the study within the 1st week"*  Comment: The author did not indicate what groups these participants (who withdrew) belonged to, however, final sample sizes were 42 in the intervention group and 43 in the control group. Assuming participants were equally distributed (45/group), we can assume 7% were lost in the intervention group and 5% lost in the control group. Since lost to follow up was less than 20% and similar between groups, this was judged as low risk of bias. No complete clusters were lost from the trial. | |
| **Selective reporting** (reporting bias) | Low | | Comment: The study protocol is not available online (i.e. not cited in the study, registered on ClinicalTrials.gov or the WHO portal, and not found through a Google Search), although there were no inconsistencies within the paper to suggest measures reported were different than those intended to be reported at the beginning of the study. This being said, although the author indicated that participants within a group tended to be more alike than between groups, they did not report an intraclass correlation coefficient (although did take into account during their analysis). | |
| **Other bias** (non-compliance) | Low | | Non-compliance: There was no comment about compliance in the dissertation, although did indicate that those who withdrew and did not complete the intervention were excluded (i.e. contributing to attrition bias not non-compliance). Therefore, this study is judged as low risk of non-compliance bias. | |
| Author, Year | | Mak, 2015 (China) | | |
| Methods | | Randomized Controlled Trial | | |
| Participants | | 321 university students and staff (mean age=22.8; 92.8% of the participates were students; 66.3% females). | | |
| Interventions | | Basic Mindfulness Group  Participants were provided with a 3 hour training session on mindfulness and how to use the website. Participants were then asked to complete online lessons for 8 weeks. The online programs were similar to the traditional MBSR. They were to spend average of 30 minutes each week viewing videos on mindfulness, in addition to viewing mindfulness videos/audio for mindful-stretching for 20-30 mins each. They were asked to practice mindfulness for 20-30 mins each day, 6 days a week. | | |
| Comparator | | Waitlist control | | |
| Outcomes of interest | | Post intervention and 3 month follow-up:   - Depression: measured with the DASS - Anxiety: measured with the DASS - Perceived Stress: Measured with the PSS | | |
| Author’s Conclusions | | The basic mindfulness group showed improved mental wellbeing from pre-post intervention, and this was sustained at follow-up. | | |
| Notes | |  | | |
| Risk of Bias | | | | |
| **Random Sequence Generation** (selection bias) | | Low | | Quote: “*We randomly assigned them into three groups based on a random digit generated by the computer program"* |
| **Allocation concealment** (selection bias) | | High | | Comment: It was not specified in the paper if an external party conducted the randomization. |
| **Blinding of participants and personnel** (performance bias) | | High | | Comment: There was no comment in the article about blinding, nor was there a sham-intervention. It was thus assumed that participants were not blinded and risk of performance bias is high. |
| **Blinding of outcome assessment** (detection bias) | | High | | Comment: The survey was a self-administered questionnaire. As this study uses self-report outcomes and participants are not blinded, there is a risk of detection/participant ascertainment bias and recall bias. |
| **Incomplete outcome data** (attrition bias) | | High | | Quote*: "* …the overall retention rates were 51.1% (164/321) and 32.7% (105/321) at post-assessment and 3-month follow-up, respectively.”  Comment: High rate of attrition and reasons not provided. Judged as high risk of attrition bias.. |
| **Selective reporting** (reporting bias) | | Low | | Comment: Chinese Clinical Trial Registry (ChiCTR): ChiCTR-TRC-12002954; http://www.chictr.org/en/proj/show.aspx?proj=3904 The final paper appeared to address all pre-specified outcomes. |
| **Other bias** (non-compliance) | | Low | | Comment: Compliance was not defined in the study. Thus, it is assumed that it was not an issue. |
| Author, Year | | McIndoo, 2016 (Hong Kong) | | |
| Methods | | Randomized Controlled Trial | | |
| Participants | | 50 college students with mild to severe depression and/or diagnosed with current MDD without psychosis or substance dependence (mean age=19.2; 62% females). | | |
| Interventions | | Mindfulness-Based Stress Reduction  4 weekly 1-hour sessions guided by clinician to engage in mindfulness activities to bring awareness to their eating, physical/cognitive/emotional responses, body scans, walking meditation, and Hatha yoga/stretching while paying attention to the body. Participants were assigned home meditation practice related to the session from the previous week. | | |
| Comparator | | Behavioural activation  4 weekly 1-hour sessions of treatment, involving motivation exercises and discussions, discussing rationale of the therapy. Participants completed a life values assessment in which they discussed expectations and goals (Week 1), reviewed their value-based behaviours and discussed progress towards their goals (weeks 2-4). Daily practice was not required. | | |
| Outcomes of interest | | Post-intervention:   - Depressive Symptoms: measured with the Beck Depression Inventory | | |
| Author’s Conclusions | | For both BA and MBT, there were significant pre-post treatment gains across outcome measures assessing depression, rumination, stress, and mindfulness. Treatment gains were maintained at the one-month follow up except FFMQ (mindfulness). Effect sizes indicated that these improvements on all outcome measures were clinically significant. | | |
| Notes | |  | | |
| Risk of Bias | | | | |
| **Random Sequence Generation** (selection bias) | | Low | | Quote: "*Participants were randomly assigned to BA, MBT, or the WLC."*  Comment: mentioned a random component. |
| **Allocation concealment**(selection bias) | | High | | Comment: It was not specified who was conducting the randomization. |
| **Blinding of participants and personnel** (performance bias) | | High | | Comment: Participants were randomized to two different active interventions, but there was no comment in article about blinding of outcome assessment. It was assumed participants were not blinded and risk of performance bias is high. |
| **Blinding of outcome assessment** (detection bias) | | High | | Quote: *"At session five (post-treatment), all participants completed the full battery of self-report measures"*  Comment: Given that assessments are self-report measures and blinding procedures are unclear, this study is at high risk of detection/participant ascertainment bias and recall bias. |
| **Incomplete outcome data** (attrition bias) | | Low | | Quote: *"Due to low patient attrition (i.e., 8% at post-treatment; 12% at one-month follow-up), the decision was made to not utilize multiple imputation strategies to replace missing values...the study [found] no significant group differences on demographic and pre-treatment clinical variables"*  Comment: Attrition was less than 20%, and therefore seen as low risk of attrition bias. |
| **Selective reporting** (reporting bias) | | Low | | Comment: The study protocol is not available online (i.e. not cited in the study, registered on ClinicalTrials.gov or the WHO portal, and not found through a Google Search), although there were no inconsistencies within the published paper and disseration to suggest measures reported were different than those intended to be reported at the beginning of the study. |
| **Other bias** (non-compliance) | | Low | | Non-compliance: No comment about compliance in the dissertation and therefore no reason to suspect concern. |
| Author, Year | Nguyen-Feng, 2016 (US) (published and unpublished) | | | |
| Methods | Randomized Controlled Trial | | | |
| Participants | 314 undergraduate students in an introduction to psychology course (age=18-21; 63% females). Students were asked about interpersonal violence and separate analyses were conducted for those responding positively to experiencing interpersonal violence and those who responded negatively. | | | |
| Interventions | Present Control + Mindfulness  The intervention is 3 weeks in length and includes 3 web-based psycho-educational modules (3-4minutes) along with 3 8-12 minute guided mindfulness exercises (audio files) followed by practice logs/reflections. Daily practice was not required. | | | |
| Comparator | Present Control  Receives the same psycho-educational modules as the mindfulness intervention but the Present Control Intervention involves the completion of stress logs about current stressors. They are asked to identify what aspects of those stressors were inside or outside one’s control, what actions they could take related to stressors within their control, and what had changed about the stressor as a result of the actions they had taken. | | | |
| Outcomes of interest | Post-intervention:   - Stress (separate for IPV and no IPV): measured with the Perceives Stress Scale (PSS) - Depressive Symptoms (combined sample): measured with the DASS depression subscale - Anxiety Symptoms (combined sample): measured with the DASS anxiety subscale | | | |
| Author’s Conclusions | - There were significant decreases in distress, perceived stress, and worry within the mindfulness group (not seen in the PCI alone group) for both participants with and without a history of IPV. | | | |
| Notes | The paper reported the combined DASS scores. Subscale scores were obtained via personal communication with the author. | | | |
| Risk of Bias | | | | |
| **Random Sequence Generation** (selection bias) | Low | | Quote: *"Participants were randomly assigned."*  From personal communication: *"Randomization was conducted using the RAND function in Excel."*  Comment: The investigators describe a random component in the sequence generation process (RAND in excel). | |
| **Allocation concealment**(selection bias) | Low | | From personal communication: *"A lab research assistant conducted the randomization."*  Comment: Although not explicitly described, personal communication with the author suggests that someone other than the primary investigator conducted the randomization, limiting the risk of selection bias. | |
| **Blinding of participants and personnel** (performance bias) | Low | | Personal communication: "*The participants were not explicitly told which intervention condition they were randomized into"*  Comment: The investigators took measures to minimize the risk of performance bias by not revealing which intervention was the control or their group assignment. | |
| **Blinding of outcome** assessment (detection bias) | Low | | Comment: No comment in article. However, since outcomes are self-report and participants were blinded to group assignment, the risk of detection/participant ascertainment bias is minimized or mitigated | |
| **Incomplete outcome data** (attrition bias) | High | | Quote: *"Based on this criterion 'careless responder' or IPV status unclear two individuals from the PCI condition and three individuals from the PC+MF condition were removed."*  From Figure 1: *237 (78%) completed the postintervention survey. 20 (25%) individuals were lost to follow-up in PCI group (13 no IPV, 7 IPV) while 23 (29%) were lost to follow up in the mindfulness group (14 no IPV, 9 IPV).*  Comment: Although attrition was similar across groups, reasons for dropping out of the study or not completing surveys were not provided and every group lost >20% of participants. Also, multiple imputations was performed however, only performed 10 imputations were performed for 25-29% missing. White et al. (2011) suggests for adequate reproducibility and efficiency, the number of imputations should be at least equal to the percent of incomplete cases. Therefore, this was judged as high risk of attrition bias.  White, I. R., Royston, P., & Wood, A. M. (2011). Multiple imputation using chained equations: issues and guidance for practice. *Statistics in medicine*, *30*(4), 377-399. | |
| **Selective reporting** (reporting bias) | Low | | Comment: The study protocol is not available online (i.e. not cited in the study, registered on ClinicalTrials.gov or the WHO portal, and not found through a Google Search), although there were no inconsistencies within the paper to suggest measures reported were different than those intended to be reported at the beginning of the study. | |
| **Other bias**(non-compliance) | Low | | Non-compliance: No comment about compliance in the published paper. Therefore, this study was deemed as low risk of non-compliance bias. | |
| Author, Year | | Oman, 2008 (US) | | |
| Methods | | Randomized Controlled Trial | | |
| Participants | | 47 1st, 2nd, and 3rd year students at California University who live in campus housing (mean age not specified, 18-24years of age; 80% females) | | |
| Interventions | | MBSR  The intervention consisted of 90 minutes in-person group sessions once per week for 8 weeks. Daily practice was expected. | | |
| Comparator | | Wait List Control | | |
| Outcomes of interest | | Post Intervention and 8 weeks following   - Perceived Stress: PSS | | |
| Author’s Conclusions | | "*We evaluated the effects of 2 meditation-based programs on undergraduates' stress and well being. These programs have demonstrated stress reduction effects among adults, are non-sectarian and generate wide cross cultural inters. In a self-selected group of undergraduates we documented reductions in stress, increases in forgiveness and trends toward reduced rumination"* | | |
| Notes | | Post-scores not available in article. Contacted author for scores twice. Did not hear back. Results reported narratively. | | |
| Risk of Bias | | | | |
| **Random Sequence Generation** (selection bias) | | High | | Comment: Computer soft ware was used to generate randomization. However, participants were allowed to change groups- 5 participants in the intervention groups allowed to switch due to time conflicts. |
| **Allocation concealment** (selection bias) | | High | | Comment: While the computer generated the random sequence, method of allocation communication to participants was not mentioned. |
| **Blinding of participants and personnel** (performance bias) | | High | | Comment: Participants knew which group they were in and knew the other group options (as were able to change intervention groups). |
| **Blinding of outcome assessment** (detection bias) | | High | | Comment: Since outcomes are self-report and participants were not blinded to group assignment, there is a risk of detection/participant ascertainment bias and recall bias. |
| **Incomplete outcome data** (attrition bias) | | Low | | Quote: *“All but 1 of the 44 participants (98%) completed Exam 2. After 8 more weeks, we emailed a link for the online FU (exam 3) which all but one of the 44 pts completed*.”  Comment: Less than 3% attrition |
| **Selective reporting** (reporting bias) | | Low | | Comment: The study protocol is not available online (i.e. not cited in the study, registered on ClinicalTrials.gov or the WHO portal, and not found through a Google Search), although there were no inconsistencies within the paper to suggest measures reported were different than those intended to be reported at the beginning of the study. |
| **Other bias** (non-compliance) | | Low | | Comment: Non-compliance was not a concern in this study, no at home practice was required, and few sessions were missed |
| Author, Year | | Omidi, 2013 (Tehran) | | |
| Methods | | Randomized Controlled Trial | | |
| Participants | | 90 patients who were referred to a University Counselling Centre and met criteria for MDD (ages 18-45; 67% females). | | |
| Interventions | | MBCT  Participants attended 8 2-h in-person classes, with up to an hour spent on meditation practices. Homework involved 1 hour of meditation or behavioural practices every day. | | |
| Comparator | | 1. Active control: CBT - Followed the original 8-week CBT course described by Emery (2000). 2. Treatment as usual | | |
| Outcomes of interest | | Post Intervention   - Depression: Measured with the Brief Symptoms Iventory - Anxiety: measured with the SCID (used means[SDs]) | | |
| Author’s Conclusions | | Post-intervention, the participants reported significantly reduced perceived stress and positive status of mind compared to baseline. There was no significant difference between CBT and MBCT program. | | |
| Notes | |  | | |
| Risk of Bias | | | | |
| **Random Sequence Generation** (selection bias) | | Low | | Comment: A randomized clinical trial design was used. Participants were selected randomly and allocated to three equal groups. |
| **Allocation concealment**(selection bias) | | High | | Comment: It was not specified who was conducting the randomization. |
| **Blinding of participants and personnel** (performance bias) | | High | | Comment: Authors did not comment on patient blinding - also difficult to do due to the nature of the intervention. Therefore, it was assumed this study has a high risk of performance bias. |
| **Blinding of outcome assessment** (detection bias) | | High | | Comment: The survey was a self-administered questionnaires. As this study uses self-report outcomes and participants are not blinded, there is a risk of detection/participant ascertainment bias and recall bias. |
| **Incomplete outcome data** (attrition bias) | | High | | Comment: It is unclear how many participants were lost to follow-up. The author states “*90 individuals were studied before and after completion of the MBCT, CBT, TAU"* but did not indicate any method of dealing with missing data. The author also states “There were no differences between non-completers and completers” indicating there was attrition. Number lost to follow up/attrition and approach for missing values was not mentioned, thus rated down for high risk of attrition bias (or incomplete data). |
| **Selective reporting** (reporting bias) | | Low | | Comment: The study protocol is not available online (i.e. not cited in the study, registered on ClinicalTrials.gov or the WHO portal, and not found through a Google Search), although there were no inconsistencies within the paper to suggest measures reported were different than those intended to be reported at the beginning of the study. |
| **Other bias** (non-compliance) | | Low | | Comment: Compliance was not defined in the study. Thus, it is assumed that it was not an issue. |
| Author, Year | Paholpak, 2012 (Thailand) (published and unpublished) | | | |
| Methods | Randomized Controlled Trial | | | |
| Participants | 58 5th year medical students completing their 4-week rotation in the Department of Psychiatry (mean age=23.43; 50% females) | | | |
| Interventions | Breathing Meditation  The intervention lasted 4 weeks. Participants in the intervention group engaged in 20-minutes of mindfulness every morning before class (i.e. 5x/week). The mindfulness meditation was guided by a pre-recorded CD of a trained instructor. | | | |
| Comparator | Active Control  Participants who were not in the intervention group met in a different room 20 minute before class and were able to do whatever they wanted during that time. | | | |
| Outcomes of interest | Post-intervention:   - Depressive Symptoms: measured through the Self-Checklist 90 depression subscale - Anxiety Symptoms: measured through the Self-Checklist 90 anxiety subscale | | | |
| Author’s Conclusions | - The mean difference (before-after) of each SCL-90 dimension was larger in the mindfulness group; however, it did not reach significance for any of the subscales. | | | |
| Notes | Obtained raw data from the author for calculations as the published article contained only the change scores were reported . | | | |
| Risk of Bias | | | | |
| **Random Sequence Generation** (selection bias) | Low | | Quote: “*Random allocation"*  Comment: Although the random component of assignment was not described in detail, the authors did indicate random assignment was done and there is no reason to believe they did not conduct randomization. | |
| **Allocation concealment**(selection bias) | High | | Quote: *"Block of four design"*  Comment: Although blocked randomization was performed, the blocks were small, and the researcher would have the ability to foresee assignment. No indication that concealment was used during allocation. | |
| **Blinding of participants and personnel** (performance bias) | High | | Comment: There was no comment in the article about blinding. Blinding is difficult due to nature of the intervention; blinding is only possible in a behavioural intervention if a sham intervention is provided where participants are unable to determine if they are in the treatment or comparison group. Therefore, since the comparison was a no-intervention control (not a sham intervention), and there was no comment about blinding, it was assumed participants were not blinded and risk of performance bias is high. | |
| **Blinding of outcome** assessment (detection bias) | High | | Comment: There was no comment in article about blinding of outcome assessment. Since outcomes are self-report and participants were not blinded to group assignment, there is a risk of detection/participant ascertainment bias and recall bias. | |
| **Incomplete outcome data** (attrition bias) | Low | | Comment: No comment about attrition or missing results. Since the study was done prior to class, there is no reason to suspect attrition in the sample. | |
| **Selective reporting** (reporting bias) | Low | | Comment: The study protocol is not available online (i.e. not cited in the study, registered on ClinicalTrials.gov or the WHO portal, and not found through a Google Search), although there were no inconsistencies within the paper to suggest measures reported were different than those intended to be reported at the beginning of the study. Although the change scores on the Self-Checklist 90 were reported, the raw data for the post-scores were obtained from the trialists (due to the type of meta-analysis). | |
| **Other bias**(non-compliance) | Low | | Non-compliance: No comment about compliance, although compliance is suspected to be high since intervention occurred prior to class. | |
| Author, Year | Phang, 2015 (Malaysia) (published data) | | | |
| Methods | Randomized Controlled Trial | | | |
| Participants | 75 medical students (mean age=~21; 76% females) | | | |
| Interventions | Mindful-gym (based on MBSR and MBCT)  Intervention lasted 5 weeks and consisted of 2-hour guided groups every week with 3-5minutes of practice at home per day (CD provided for home practice). | | | |
| Comparator | Wait-list Control | | | |
| Outcomes of interest | Post-intervention & 6months:   - Stress: measured with the Perceived Stress Scale (PSS) | | | |
| Author’s Conclusions | - The mindfulness group has significantly lower scores 1-week post-intervention than the control group, however, this result did not remain at 6 months. | | | |
| Notes |  | | | |
| Risk of Bias | | | | |
| **Random Sequence Generation** (selection bias) | Low | | Quote: *"In each year of studies [i.e. stratified by year of school], participants were randomly allocated to experimental groups with the help of an online computer program known as RANDOM.ORG"*  Comment: The investigators describe a random component in the sequence generation process (computer random number generator). | |
| **Allocation concealment**(selection bias) | Low | | Quote: *"…the random numbers generation and matching of numbers with students' name were done by a research staff who was not involved in the study."*  Comment: The investigators identified a third party who conducted the randomization limiting the risk of selection bias. | |
| **Blinding of participants and personnel** (performance bias) | High | | Quote: *"Non-blinded."*  Comment: Blinding is difficult due to nature of the intervention (unless providing a sham intervention), therefore presenting a risk of performance bias. | |
| **Blinding of outcome** assessment (detection bias) | High | | Comment: No comment in article. Since outcomes are self-report and participants were not blinded to group assignment, there is a risk of detection/participant ascertainment bias and recall bias. | |
| **Incomplete outcome data** (attrition bias) | Low | | Comment: Only one person missed the post-test assessment in the control group and 2 from the intervention group. Due to the low attrition, the study has a low risk of attrition bias. | |
| **Selective reporting** (reporting bias) | Low | | Comment: The study protocol is not available online (i.e. not cited in the study, registered on ClinicalTrials.gov or the WHO portal, and not found through a Google Search), although there were no inconsistencies within the paper to suggest measures reported were different than those intended to be reported at the beginning of the study. | |
| **Other bias**(non-compliance) | Low | | Non-compliance: The authors did not operationalize "completion" of the program. 49% had full attendance, 32% attended four out of five of the sessions. 14% attended three out of the five sessions, and 5% attended two sessions. On average, students were practicing at home for half of the days. Due to the relatively high compliance, this study will be judged as low non-compliance bias. | |
| Author, Year | Phang (DVD), 2015 (Malaysia) (published and unpublished data) | | | |
| Methods | Randomized Controlled Trial | | | |
| Participants | 76 medical students (mean age=~21; 79% females) | | | |
| Interventions | Mindful-gym (based on MBSR and MBCT) DVD  The intervention lasted 5 weeks and consisted of 5 modules delivered through a DVD. Participants were expected to engage in 3-5minutes of mindfulness practice per day. | | | |
| Comparator | Wait-list Control | | | |
| Outcomes of interest | Post-Assessment:   - Stress: measured with the Perceived Stress Scale (PSS) - Depressive Symptoms: measured with the DASS depression subscale - Anxiety symptoms: measured with the DASS anxiety subscale | | | |
| Author’s Conclusions | - The mindfulness group demonstrated significantly improvements in perceived stress and mental distress 1 week post-intervention compared to control. | | | |
| Notes | Published article reported DASS scores as a cumulative score. Author provided the scores for the DASS subscales (depression and anxiety) via email. | | | |
| Risk of Bias | | | | |
| **Random Sequence Generation** (selection bias) | Low | | Quote: *"In each year of studies [i.e. stratified by year of school], participants were randomly allocated to experimental groups with the help of an online computer program known as RANDOM.ORG"*  Comment: The investigators describe a random component in the sequence generation process (computer random number generator). | |
| **Allocation concealment** (selection bias) | Low | | Quote*: "…the random numbers generation and matching of numbers with students' name were done by master student in counselling who was not involved in the study."*  Comment: The investigators identified a third party who conducted the randomization limiting the risk of selection bias. | |
| **Blinding of participants and personnel** (performance bias) | High | | Quote: *"Non-blinded."*  Comment: Blinding is difficult due to nature of the intervention (unless providing a sham intervention), therefore presenting a risk of performance bias. | |
| **Blinding of outcome** assessment (detection bias) | High | | Comment: No comment in article about outcome assessment. Since outcomes are self-report and participants were not blinded to group assignment, there is a risk of detection/participant ascertainment bias and recall bias. | |
| **Incomplete outcome data** (attrition bias) | Low | | Comment: Only one person missed the post-assessment who was in the control group. Due to the low attrition, the study has a low risk of attrition bias. The trialists also conducted per protocol analysis and found similar results, indicating that the missing results did not significantly impact the findings. | |
| **Selective reporting** (reporting bias) | Low | | Comment: The study protocol is not available online (i.e. not cited in the study, registered on ClinicalTrials.gov or the WHO portal, and not found through a Google Search), although there were no inconsistencies within the paper to suggest measures reported were different than those intended to be reported at the beginning of the study. | |
| **Other bias**(non-compliance) | Low | | Non-compliance:*"On average, participants were practicing the Mindful-Gym exercises on about half of the days in a week. About two thirds (63%) were practicing at least half of the days..compliance with daily practice was reasonable and roughly comparable to other studies among medical students." T*he authors stated compliance was acceptable, so this study will be judged as low non-compliance bias. | |
| Author, Year | Ratanasiripong, 2015 (Thailand) (published and unpublished dissertation) | | | |
| Methods | Randomized Controlled Trial | | | |
| Participants | 89 second year Thai nursing students (mean age=19.27; 100% females) | | | |
| Interventions | Mindfulness Meditation  The program lasted 4 weeks and included two in-person trainings taught by a trained instructor followed by independent practice 3 times per week for 4 weeks. | | | |
| Comparator | 1. Biofeedback Group   Biofeedback group was structured the same as the mindfulness group with two trainings followed by independent home practice.   1. No Intervention Group | | | |
| Outcomes of interest | Post-intervention:   - Stress: measured with the Perceived Stress Scale (PSS) - Anxiety Symptoms: measured with the State Anxiety Scale | | | |
| Author’s Conclusions | - Mindfulness meditation group has a significant reduction in perceived stress from baseline, however no significant differences between groups (including control and biofeedback). - There was a significant decrease in State Anxiety in the mindfulness group, which was significantly different than the control group (no decreases in anxiety). | | | |
| Notes | Same study as Park 2014 (Parks dissertation) | | | |
| Risk of Bias | | | | |
| **Random Sequence Generation** (selection bias) | Low | | Quote: *"Participants were randomly assigned to one of three groups."*  Comment: Although the random component of assignment was not described in detail, the authors did indicate random assignment was done and there is no reason to believe they did not conduct randomization. | |
| **Allocation concealment**(selection bias) | High | | Comment: No comment about who conducted the randomization and if the randomization sequence was open. | |
| **Blinding of participants and personnel** (performance bias) | High | | Comment: There was no comment in the article about blinding. Blinding is difficult due to nature of the intervention; blinding is only possible in a behavioural intervention if a sham intervention is provided where participants are unable to determine if they are in the treatment or comparison group. Therefore, since one of the comparisons was a no-intervention control (not a sham intervention), and there was no comment about blinding, it was assumed participants were not blinded and risk of performance bias is high. | |
| **Blinding of outcome** assessment (detection bias) | High | | Comment: There was no comment in article about blinding of outcome assessment. Since outcomes are self-report and participants were not blinded to group assignment, there is a risk of detection/participant ascertainment bias and recall bias. | |
| **Incomplete outcome data** (attrition bias) | Low | | Quote: *"89 participants remained in the study and were used for data analysis."*  Comment: No mention of attrition, loss to follow-up, or drop out. No reason to believe there was any attrition based on what author wrote. | |
| **Selective reporting** (reporting bias) | Low | | Comment: The study protocol is not available online (i.e. not cited in the study, registered on ClinicalTrials.gov or the WHO portal, and not found through a Google Search), although there were no inconsistencies within the paper to suggest measures reported were different than those intended to be reported at the beginning of the study. | |
| **Other bias**(non-compliance) | Low | | Non-compliance: No comment about compliance in the dissertation or published article and therefore no reason to suspect a concern. | |
| Author, Year | Rowland, 2016 (Germany) (published and unpublished data) | | | |
| Methods | Randomized Controlled Trial | | | |
| Participants | 137 university students without mental illness (mean age=23.08; 76%females) | | | |
| Interventions | Mindfulness Intervention  6 weeks in length.  *“Mindfulness is practiced with a weekly computer based guided breathing meditation in which one's own breath has to be counted repetitively from 1 to 9. Participants have to press a specific button for breaths 1 to 8 and then press another button for breath 9 on a keyboard. During this practice they put on headphones and listen to a voice that guides them through breathing meditation. A "click" sound will occur if breath is miscounted (Levinson et al., 2014). After each computer based breathing meditation the experimenter and participants exchange meditation experiences and views. After the first mindfulness training participants in the experimental group are also able to practice mindfulness at home by listening to audio files on the mobile phone (bodyscan or breathing meditation*).” Home practice encouraged but not required. | | | |
| Comparator | No intervention | | | |
| Outcomes of interest | Post-intervention:   - Depressive Symptoms: measured with the Brief Symptom Inventory (BSI) depression subscale - Anxiety Symptoms: measured with the Brief Symptom Inventory (BSI) anxiety subscale | | | |
| Author’s Conclusions | - Obtained through personal correspondence: No significant differences between groups on anxiety or depression measures. | | | |
| Notes | Protocol published. Results obtained via email correspondence. | | | |
| Risk of Bias | | | | |
| **Random Sequence Generation** (selection bias) | Low | | Quote: *"Randomized to a control (n=60) or intervention condition (n=60)"*  Comment: Although the random component of assignment was not described in detail, the authors did indicate random assignment was done and there is no reason to believe they did not conduct randomization. | |
| **Allocation concealment** (selection bias) | High | | Comment: No comment about who conducted the randomization. | |
| **Blinding of participants and personnel** (performance bias) | High | | Quote: *Masking: Open Label*  Comment: Participants were not blinded so risk of performance bias is high. | |
| **Blinding of outcome** assessment (detection bias) | High | | Comment: No comment in article. Since outcomes are self-report and participants were not blinded to group assignment, there is a risk of detection/participant ascertainment bias and recall bias. | |
| **Incomplete outcome data** (attrition bias) | Low | | Comment: Based on sample size at baseline versus post-intervention from data provided via email correspondence, 5(7%) individuals in the control group and 7(10%) individuals in the intervention group were lost to follow up and did not completed post-assessment surveys. Since less than 10% were lost to follow up, and losses were similar between groups, the study will be considered as having a low risk of attrition bias. | |
| **Selective reporting** (reporting bias) | Low | | Comment: Data is not yet published, however, the author did provide outcome data on pre-specified variables. | |
| **Other bias**(non-compliance) | Low | | Non-compliance: No data available on compliance at this time. | |
| Author, Year | | Shapiro. 1998 (US) (published and unpublished) | | |
| Methods | | Randomized Controlled Trial | | |
| Participants | | 76 pre-medical and medical students (mean age=NA; 56.16% females). | | |
| Interventions | | Mindfulness-based stress reduction  The intervention was presented as an 8-week elective in Stress Reduction and Relaxation focusing on sitting meditation, body scan, hatha yoga, and loving-kindness/forgiveness meditation. The course itself was 8 weeks in length consisting of 2.5hours sessions and weekly home practice assignments and daily journals. | | |
| Comparator | | Wait List Control | | |
| Outcomes of interest | | Post Intervention, 2 months, and 12 months follow-up   - Depression: Measured with the SL-90 - Anxiety: Measured with State Anxiety Inventory | | |
| Author’s Conclusions | | Relative to control, MBSR treatment reported less depression and less anxiety than the control group. | | |
| Notes | | Contacted for post-score results. Dr. Shapiro stated “Unfortunately I do not have the data any longer it crashed with my last computer.” Therefore, only included in a narrative synthesis. | | |
| Risk of Bias | | | | |
| **Random Sequence Generation** (selection bias) | | Low | | Quote*: "78 participants met these criteria and were randomly assigned to an intervention group or a waitlist control group. Randomization was matched for gender, race, and medical vs. pre-medical status."*  Comment: Indicated a random component to group assignment. |
| **Allocation concealment**(selection bias) | | High | | Comment: It was not specified who was conducting the randomization, and no comment was made about how individuals were informed of their status. |
| **Blinding of participants and personnel** (performance bias) | | High | | Comment: No comment was made: due to the waitlist nature of the waitlist control group, it is likely that participants were aware of their status |
| **Blinding of outcome assessment** (detection bias) | | High | | Quote: *"Assessment measures were administered and collected y an undergraduate research assistant not involved in the design of the research or the intervention. Further all participants were assigned a confidential identification number which the primary investigator did not have access too"*  Even though there were procedures in place to minimize detection bias, the survey was a self-administered questionnaires. As this study uses self-report outcomes and participants are not blinded, there is a risk of detection/participant ascertainment bias and recall bias. |
| **Incomplete outcome data** (attrition bias) | | Low | | Comment: 73 of the 78 participants that were randomized completed all assessments. 1 in the intervention group, and 4 in the control group. Since attrition was low, there was a low risk for incomplete outcome reporting. |
| **Selective reporting** (reporting bias) | | Low | | Comment: The study protocol is not available online (i.e. not cited in the study, registered on ClinicalTrials.gov or the WHO portal, and not found through a Google Search), although there were no inconsistencies within the paper to suggest measures reported were different than those intended to be reported at the beginning of the study. |
| **Other bias** (non-compliance) | | Low | | Comment: There was weekly homework assignments, however at-home compliance was not raised as a concern. |
| Author, Year | | Shapiro 2012 (US) | | |
| Methods | | Randomized Controlled Trial | | |
| Participants | | 23 1st, 2nd, and 3rd year undergraduate students (mean age=18.73; 86.7% females) | | |
| Interventions | | MBSR  The intervention was an 8 week, 90 minutes/week training program, centralizing on teaching sitting meditation and integrating meditative states into daily living (drawn from original larger study). There was a focus on mindful attention, patience, letting go, poetry reflecting mindfulness perspectives. In the study itself, there was no description of intervention. Although not explicitly stated in the article, MBSR includes an expectation of daily practice and this study did not appear to make any adaptations to the intervention. | | |
| Comparator | | Wait-list control | | |
| Outcomes of interest | | Post intervention, 2 months, 12 months   - Stress: Measured with the PSS | | |
| Author’s Conclusions | | There was no significant difference between groups for perceived stress. | | |
| Notes | |  | | |
| Risk of Bias | | | | |
| **Random Sequence Generation** (selection bias) | | Low | | Quote: *"32 participants completed consent forms and the online pre-test measures and were randomly allocated between the MBSR ) and a wait-list control group"*  Comment: Indicated a random component to group assignment. |
| **Allocation concealment**(selection bias) | | High | | Comment: It was not specified who was conducting the randomization. |
| **Blinding of participants and personnel** (performance bias) | | High | | Comment: While there was an active control, there was no comment in the article about blinding. It was assumed participants were not blinded and risk of performance bias is high. |
| **Blinding of outcome assessment** (detection bias) | | High | | Survey was a self-administered questionnaires. As this study uses self-report outcomes and participants are not blinded, there is a risk of detection/participant ascertainment bias and recall bias. |
| **Incomplete outcome data** (attrition bias) | | Low | | Comment: *"Although all 30 participants completed the study, missing data on several variables were present.... These missing data were replaced by carrying forward that participant’s data from the last assessment to the subsequent missing data point ..This approach preserves sample size, reducing possible artifactual effects of differential attrition from the two treatment conditions"*  Comment: Low attrition and methods in place for dealing with missing items. |
| **Selective reporting** (reporting bias) | | Low | | Comment: The study protocol is not available online (i.e. not cited in the study, registered on ClinicalTrials.gov or the WHO portal, and not found through a Google Search), although there were no inconsistencies within the paper to suggest measures reported were different than those intended to be reported at the beginning of the study. |
| **Other bias** (non-compliance) | | Low | | Comment: Compliance was not defined in the study. Thus, it is assumed that it was not an issue. |
| Author, Year | | Song, 2015 (Korea) | | |
| Methods | | Randomized Controlled Trial | | |
| Participants | | 50 undergraduate nursing students with no current psychiatric symptoms and who have not been engaging in regular yoga practice within the past 6 months (mean age=19.5; 81% females). | | |
| Interventions | | MBSR  The intervention was conducted in person during two hour weekly sessions over the course of 8 weeks. Home practice and assignments given each week including daily practice. | | |
| Comparator | | Wait List Control | | |
| Outcomes of interest | | Post-Intervention   - Depressive Symptoms: DASS depression subscale - Anxiety Symptoms: DASS anxiety subscale - Stress: DASS stress subscale | | |
| Author’s Conclusions | | This study found that a standard MBSR program had significant effects on depression, anxiety, stress and mindfulness of Korean nursing students. | | |
| Notes | |  | | |
| Risk of Bias | | | | |
| **Random Sequence Generation** (selection bias) | | Low | | Quote: *“…each group of 25 was randomized”*  Comment: Indicated a random component to sequence generation. |
| **Allocation concealment** (selection bias) | | High | | Comment: There was no mention of allocation concealment in the report. |
| **Blinding of participants and personnel** (performance bias) | | High | | Comment: There was not mention of blinding in the article, due to the waitlist nature of the study, it is likely that participants were not blinded. |
| **Blinding of outcome assessment** (detection bias) | | High | | Comment: There was no mention of blinding in the analysis of data, it is possible that researchers were aware of the arm of the study that participants were in. |
| **Incomplete outcome data** (attrition bias) | | Low | | Comment: Two students in control group failed to follow-up at 8 weeks. Thus, the analysis was done with 21 participants in the MBSR group and 23 participants in the control group. Only 12% of the study population was lost throughout the course of the intervention |
| **Selective reporting** (reporting bias) | | Low | | Comment: The study protocol is not available online (i.e. not cited in the study, registered on ClinicalTrials.gov or the WHO portal, and not found through a Google Search), although there were no inconsistencies within the paper to suggest measures reported were different than those intended to be reported at the beginning of the study. |
| **Other bias** (non-compliance) | | Low | | Comment: “*In our study, participants in the MBSR group were given homework and whether they actually did their homework was not confirmed.*” Since noncompliance to homework was not measured, this was deemed as low risk of bias. |
| Author, Year | | Taylor, 2014 (UK) | | |
| Methods | | Randomized Controlled Trial | | |
| Participants | | 80 undergraduate and post graduate students who were not receiving psychotherapy and who did not already practice mindfulness regularly (mean age =28.6; 81% females) | | |
| Interventions | | MBCT-Self Help  The intervention was the reading of the book "Mindfulness: A practical guide to finding peace in a frantic world" over 8 weeks. There were no expectations of daily practice. | | |
| Comparator | | Wait List Control | | |
| Outcomes of interest | | Post-Intervention   - Depressive Symptoms: DASS depression subscale - Anxiety Symptoms: DASS anxiety subscale - Stress: DASS stress subscale | | |
| Author’s Conclusions | | “*This is the first published RCT of mindfulness-based cognitive therapy (MBCT) self help. Findings show promise as intervention participants showed significant decreases relative to controls in anxiety, depression and stress symptom severity and significant improvements in life satisfaction, mindfulness and self-compassion. Engagement with the intervention was high, despite the lack of therapist support. These findings pave the way for future research of MBCT-SH and suggest that it may be of real benefit to people experiencing anxiety, depression and stress”* | | |
| Notes | |  | | |
| Risk of Bias | | | | |
| **Random Sequence Generation** (selection bias) | | Low | | Quote: *“…randomisation [was conducted] by stratifying participants according to DASS-21 stress scores and applying block randomisation in blocks of four.”*  Comment: The trialists indicated a random component minimizing selection bias. |
| **Allocation concealment**(selection bias) | | Low | | Quote: *“A researcher independent to the research team and blind to participant details conducted randomisation”* |
| **Blinding of participants and personnel** (performance bias) | | High | | Comment: Due to the wait list design of the study, participants were not blinding. The study was described as a *"single blinded study."* |
| **Blinding of outcome assessment** (detection bias) | | High | | Comment: Although researchers conducting analyses were blinding to the group participants were in for analysis, the outcomes were measured through self-report. As this study uses self-report outcomes and participants are not blinded, there is a risk of detection/participant ascertainment bias and recall bias. |
| **Incomplete outcome data** (attrition bias) | | Low | | Comment: Only four randomised participants (5%) failed to complete post-intervention measures. Since attrition was low, bias is low. |
| **Selective reporting** (reporting bias) | | High | | Comment: The study protocol is not available online (i.e. not cited in the study, registered on ClinicalTrials.gov or the WHO portal, and not found through a Google Search), however long term data was said to be collected but was not reported. |
| **Other bias** (non-compliance) | | Low | | Comment: There were no components of the study that raised concern for bias and noncompliance was not addressed. |
| Author, Year | Walsh, 2014 (US) (published and unpublished data) | | | |
| Methods | Randomized Controlled Trial | | | |
| Participants | 64 first year psychology undergraduate students with moderate depressive symptoms (mean age=19; 100% females). | | | |
| Interventions | Mindfulness Training  Intervention lasted 5 weeks with weekly groups lead by a trained instructor. Participants were provided with a CD and encouraged to practice at home (although not mandatory). | | | |
| Comparator | Contact-Control  Participants in the control group met in groups once per week without an intervention. | | | |
| Outcomes of interest | Post intervention:   - Depressive Symptoms: Measured with the Center for Epidemiologic Studies-Depression - Anxiety Symptoms: Measured with the anxiety subscale from the Brief Symptom Inventory (BSI) - Emotion Regulation: Measured with the Difficulties with Emotion Regulation Scale (Impulse Control subscale used for meta-analyses) | | | |
| Author’s Conclusions | - When controlling for baseline depression scores, mindfulness did not significantly reduce depressive symptoms in comparison to control. - Change in depression and DERS scores were not significantly associated with condition | | | |
| Notes | - Narrative review of emotion regulation. - DASS subscale score obtained from personal communication with the author - Was published – obtained both the dissertation and the published article. | | | |
| Risk of Bias | | | | |
| **Random Sequence Generation** (selection bias) | Low | | Quote: *"Because of scheduling constraints (e.g., course conflicts), unrestricted randomization for all participants was not possible. Therefore, group allocation procedures were as follows: (a) if a participant could participate in any of the available group times, she was randomized to a group; (b) if a participant could only participate in a restricted number of groups, she was randomized to a group that fit within her schedule; and (c) if a participant could only participate in one group, she was assigned to that group.”* ”  *“A condition was randomized for each group”*  *“All randomization procedures were completed with the assistance of an online random number generator (www.random.org)."*  Comment: Although the study indicated taking into consideration participants schedules, participants were still randomized to intervention or control (just timing of the intervention may have been limited based on participant schedules). The investigators identified a random component to assignment (i.e. computer generated). | |
| **Allocation concealment**(selection bias) | Low | | Quote: *“The PI and participants were blind to condition until the end of eligible participants were enrolled.”*  Comment: The primary investigator did not conduct the randomization, inferring a third party conducted the randomization, limiting the risk of selection bias. | |
| **Blinding of participants and personnel** (performance bias) | High | | Quote: “*Participants learned their condition status at the baseline visit.”*  Comment: Participants were not blinded and risk of performance bias is high. | |
| **Blinding of outcome** assessment (detection bias) | High | | Comment: There was no comment in article about blinding of outcome assessment. Since outcomes are self-report and participants were not blinded to group assignment, there is a risk of detection/participant ascertainment bias and recall bias. | |
| **Incomplete outcome data** (attrition bias) | Low | | Comment: Only one participant was lost to follow up in intervention group and one person in the control group. Attrition bias was considered to be low. | |
| **Selective reporting** (reporting bias) | Low | | Comment: The study protocol is not available online (i.e. not cited in the study, registered on ClinicalTrials.gov or the WHO portal, and not found through a Google Search), although there were no inconsistencies within the paper to suggest measures reported were different than those intended to be reported at the beginning of the study. Not all information required for the review was in published reports, but the trialists provided review authors with the necessary data. | |
| **Other bias** (non-compliance) | Low | | Non-compliance: Only 2 participants practiced any mindfulness at home with the CD, however this was not required for compliance in the program. No other comments were made by the author in regards to program compliance so non-compliance bias will be judged as low. | |
| Author, Year | | Warnecke, 2011 (published and unpublished) (Australia) | | |
| Methods | | Randomized Controlled Trial | | |
| Participants | | 66 Medical students in their final two years of medical school with K10 scores that indicated psychological distress (mean age=23.9; 64.6% females). | | |
| Interventions | | Mindfulness Intervention CD  The intervention consisted of daily CD guided mindfulness practices (30 minutes) for 8 weeks. | | |
| Comparator | | Wait List Control | | |
| Outcomes of interest | | Post-Intervention   - Depressive Symptoms: DASS depression subscale - Anxiety Symptoms: DASS anxiety subscale - Stress: PSS | | |
| Author’s Conclusions | | The trial findings show that practice of mindfulness can significantly lower stress and anxiety in senior medical students. | | |
| Notes | | Subscale scores obtained from the author | | |
| Risk of Bias | | | | |
| **Random Sequence Generation** (selection bias) | | Low | | Quote: “Eligible participants were randomised centrally, using block randomisation…”  Comment: indicated a random component to sequence generation. |
| **Allocation concealment** (selection bias) | | Low | | Quote: “…with block sizes of two, to the intervention arm or the usual care control arm… All packs contained a CD cover so that trial packs in the two arms of the study looked identical. The purpose of this was to conceal allocation.”  Comment: even though block randomization was small, assuming the packaged were opaque, the investigator conducting randomization would not be able to determine who was allocated to which group. |
| **Blinding of participants and personnel** (performance bias) | | High | | Comment: Randomisation was not blinded to the individual participant because of the nature of the intervention. |
| **Blinding of outcome assessment** (detection bias) | | High | | Comment: Although researchers conducting analyses were blinding to the group participants were in for analysis, the outcomes were measured through self-report. As this study uses self-report outcomes and participants are not blinded, there is a risk of detection/participant ascertainment bias and recall bias. |
| **Incomplete outcome data** (attrition bias) | | High | | Comment: Based on figure 1 flow chart, there was >20% lots to follow up in the intervention group. There were differential loss to follow-up rates between intervention and control arms and reasons for loss to follow-up were not provided. |
| **Selective reporting** (reporting bias) | | Low | | Comment: The study protocol is not available online (i.e. not cited in the study, registered on ClinicalTrials.gov or the WHO portal, and not found through a Google Search), although there were no inconsistencies within the paper to suggest measures reported were different than those intended to be reported at the beginning of the study. |
| **Other bias** (non-compliance) | | Low | | Comment: *"modest adherence*" was reported as a limitation of the study although had not defined adherence and a large amount f individuals did not fill out their records to be able to adequately monitor adherence. Since we are missing information and the authors did not state “poor” adherence, judged as low risk of bias. |

\

Section 11: Summary of Findings GRADE Tables

**Title:** Summary of Findings Table for MBI versus Passive Control

**Caption:** The summary of the quality of this reviews’ findings for MBIs compared to passive controls for depressive symptoms, anxiety symptoms, perceived stress, and sleep disturbances. Based on information from Schünemann *et al.* (2013). Created with GRADEpro GDT Software (Evidence Prime Inc., 2015).

| **Mindfulness compared to Passive Control Post Intervention for Student Mental Health** | | | | | | | | | | |
| --- | --- | --- | --- | --- | --- | --- | --- | --- | --- | --- |
| **Quality assessment** | | | | | | | | **Summary of findings** | | |
| **№ of participants (studies)** | **Risk of bias** | | **Inconsistency** | **Indirectness** | **Imprecision** | **Publication bias** | **Overall quality of evidence** | **Study event rates (%)** | | **Anticipated absolute effects** |
| **With Passive Control** | **With MBI** | **Risk difference with MBI** (lower scores reflect lower symptoms) |
| Depressive Symptoms | | | | | | | | | | |
| 1266 (20 RCTs) | serious a | | not serious b | not serious c | not serious | publication bias strongly suspected d | ⨁⨁◯◯ LOW | 626 | 640 | SMD **0.49 lower** (0.68 lower to 0.3 lower) |
| Anxiety Symptoms | | | | | | | | | | |
| 1185 (20 RCTs) | serious a | | not serious b | not serious c | not serious | publication bias strongly suspected d | ⨁⨁◯◯ LOW | 573 | 612 | SMD **0.53 lower** (0.78 lower to 0.29 lower) |
| Perceived Stress | | | | | | | | | | |
| 1643 (23 RCTs) | serious a | | not serious | not serious c | not serious | publication bias strongly suspected d | ⨁⨁◯◯ LOW | 792 | 851 | SMD **0.39 lower** (0.5 lower to 0.27 lower) |
| Sleep Problems vs. Passive Control | | | | | | | | | | |
| 199 (2 studies) | | serious e | not serious | not serious c | serious f | None g | ⨁⨁◯◯ LOW | 99 | 100 | SMD **0.35 lower** (0.78 lower to 0.08 higher) |

**CI:** Confidence interval; **SMD:** Standardised mean difference

**Explanations**

a. There is consistently high risk of bias of included studies regarding participant blinding and outcome assessment due to the nature of the behavioural intervention. Most studies had high risk of bias due to poor or no allocation concealment. Half of the studies also had significant attrition. This being said, we only downgraded by one for this domain since there were no significant subgroup effects comparing results from high risk of bias to lower risk of bias studies.

b. Although I2 is high, this heterogeneity is explained by post hoc subgroup analyses (specifically, MBCT studies had higher effect size).

c. Although most participants were females, females tend to report more internalizing symptoms and seek help more often than males, and therefore we did not downgrade for indirectness.

d. The forest plot reveals imbalanced publications, mainly presenting missing smaller negative studies.

e. High risk of selection bias (allocation concealment), performance bias, and detection bias. Another domain of selection bias (random sequence), attrition bias, reporting bias, and other biases were low risk of bias.

f. CI reflects uncertainty in the direction and magnitude of the effect. The sample size for the pooled analysis is also smaller than the optimal information size.

g. Not enough studies to assess

**Title:** Summary of Findings Table for MBI versus Active Control

**Caption:** The summary of the quality of this reviews’ findings for MBIs compared to active controls for depressive symptoms, anxiety symptoms, and perceived stress. Based on information from Schünemann *et al.* (2013). Created with GRADEpro GDT Software (Evidence Prime Inc., 2015).

| **Mindfulness compared to Active Control (Post Intervention) for student mental health** | | | | | | | | | | | |
| --- | --- | --- | --- | --- | --- | --- | --- | --- | --- | --- | --- |
| **Quality assessment** | | | | | | | | | **Summary of findings** | | |
| **№ of participants (studies) Follow-up** | **Risk of bias** | | **Inconsistency** | **Indirectness** | **Imprecision** | **Publication bias** | **Overall quality of evidence** | | **Study event rates (%)** | | **Anticipated absolute effects**  (lower scores reflect lower symptoms) |
| **With Active Control** | **With Mindfulness** | **Risk difference with Mindfulness** |
| Depressive Symptoms | | | | | | | | | | | |
| 830 (9 RCTs) | serious a | | not serious | not serious | very serious b | none | ⨁◯◯◯ VERY LOW | | 400 | 430 | SMD **0.04 higher** (0.13 lower to 0.22 higher) |
| Anxiety Symptoms | | | | | | | | | | | |
| 663 (7 RCTs) | serious a | | not serious | not serious | very serious b | none | | ⨁◯◯◯ VERY LOW | 321 | 342 | SMD **0.13 higher** (0.08 lower to 0.34 higher) |
| Perceived Stress | | | | | | | | | | | |
| 605 (6 RCTs) | serious a | not serious | | not serious | very serious b | none | | ⨁◯◯◯ VERY LOW | 292 | 313 | SMD **0.08 lower** (0.32 lower to 0.16 higher) |

**CI:** Confidence interval; **SMD:** Standardised mean difference

#### Explanations

a. There is consistently high risk of bias of included studies regarding participant blinding and outcome assessment due to the nature of the behavioural intervention. Most studies had high risk of bias due to poor or no allocation concealment. Half of the studies also had significant attrition. This being said, we only downgraded by one for this domain since there were no significant subgroup effects comparing results from high risk of bias to lower risk of bias studies.

b. The CI crosses the threshold between recommending and not recommending the treatment. Pooled sample sizes are below the OIS for a small SMD effect size. Therefore, the imprecision resulted in downgrading by two for this domain.
